# Supplementary material for: Naphthoquinone based chemosensors for transition metal ions: experiment and theory
Source: Royal Society of Chemistry journal article supplement (doi:10.1039/c7ra10490a), 2017-01-01
Supplement: c7ra10490a1.pdf [file c7ra10490a1.pdf]

## **Naphthoquinone based chemosensors for transition metal ions: Experiment and Theory**

Prajakta Gosavi-Mirkute<sup>1a</sup>, Amit Patil<sup>1a</sup>, Dipali N. Lande<sup>a</sup>, Debamitra Chakravarty<sup>b</sup>, Shridhar P. Gejji<sup>a</sup>, Surekha Satpute<sup>c</sup>, Sunita Salunke-Gawali<sup>\*a</sup>

### Supplementary Material

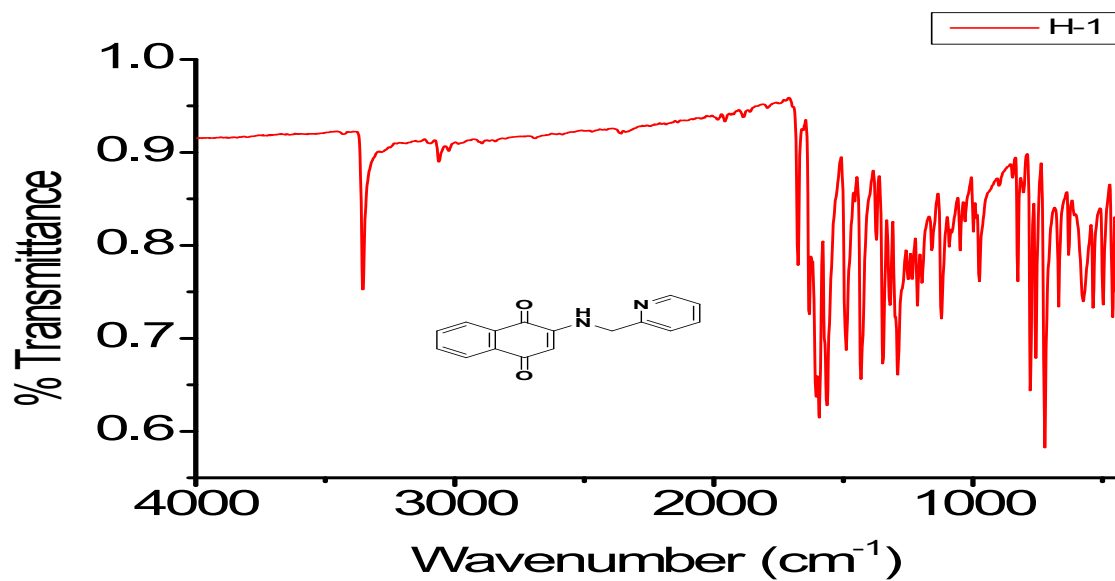

Fig. S-1 a) FT-IR spectrum of H-1 in region 4000 cm<sup>-1</sup> to 400 cm<sup>-1</sup>.

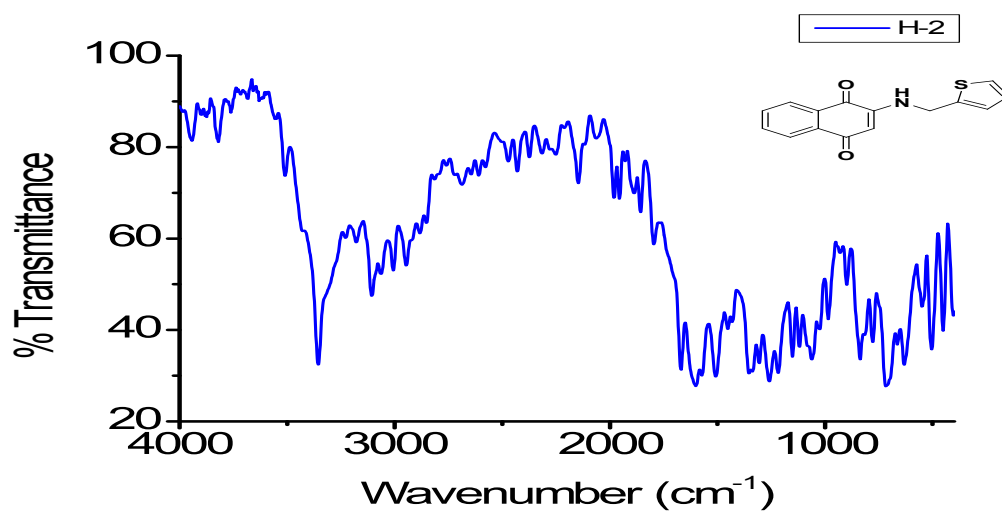

Fig. S-1 b) FT-IR spectrum of H-2 in region 4000 cm<sup>-1</sup> to 400 cm<sup>-1</sup>

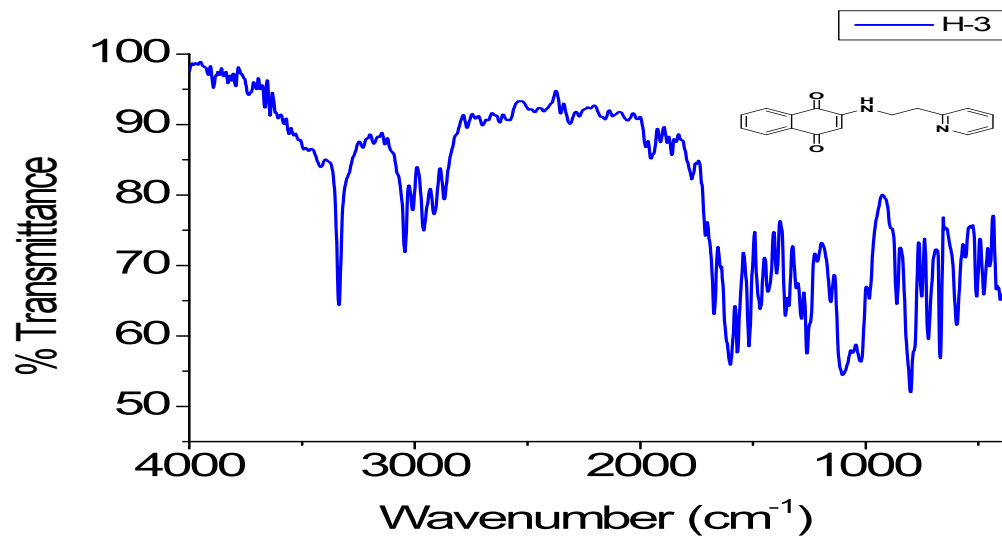

Fig. S-1 c) FT-IR spectrum of **H-3** in region 4000  $\text{cm}^{-1}$  to 400  $\text{cm}^{-1}$

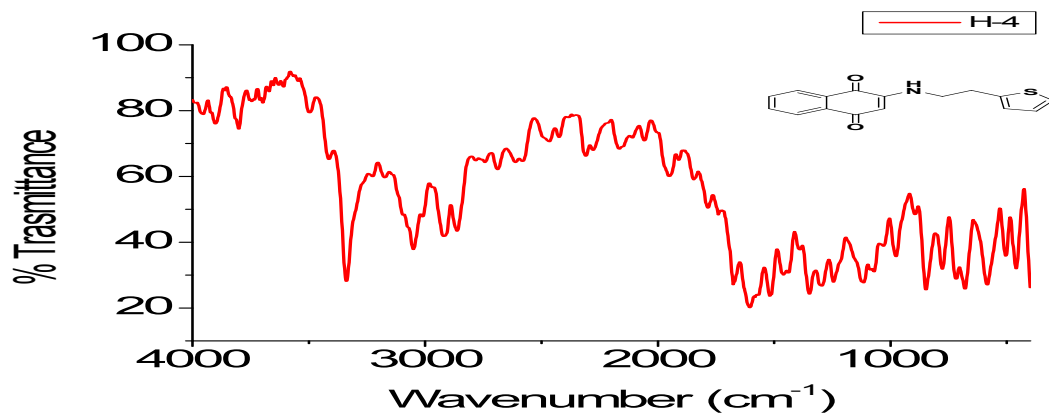

Fig. S-1 d) FT-IR spectrum of **H-4** in region 4000  $\text{cm}^{-1}$  to 400  $\text{cm}^{-1}$

a)

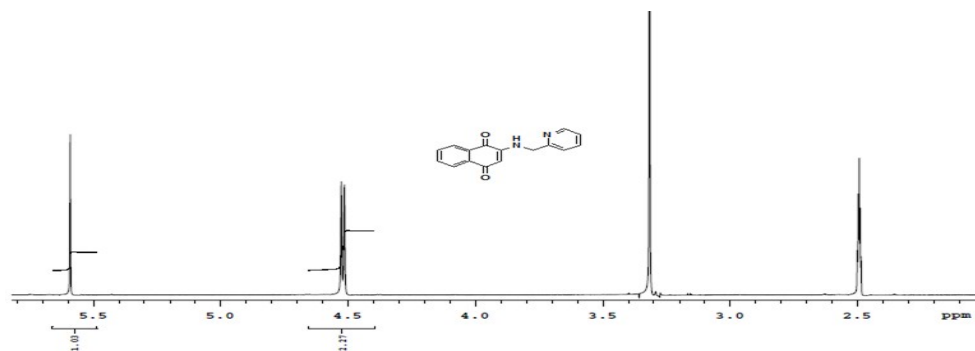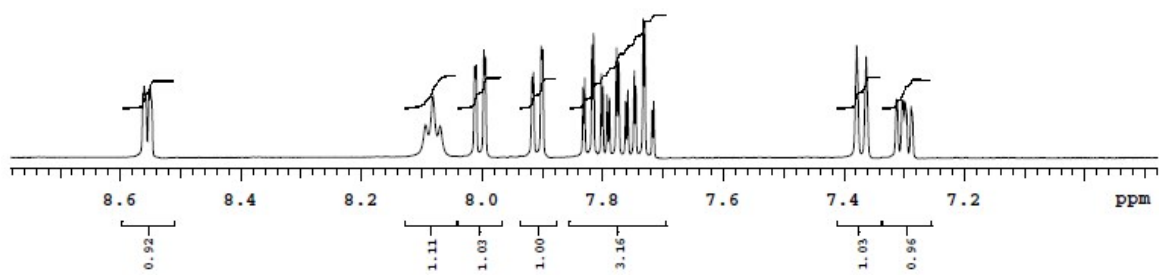

b)

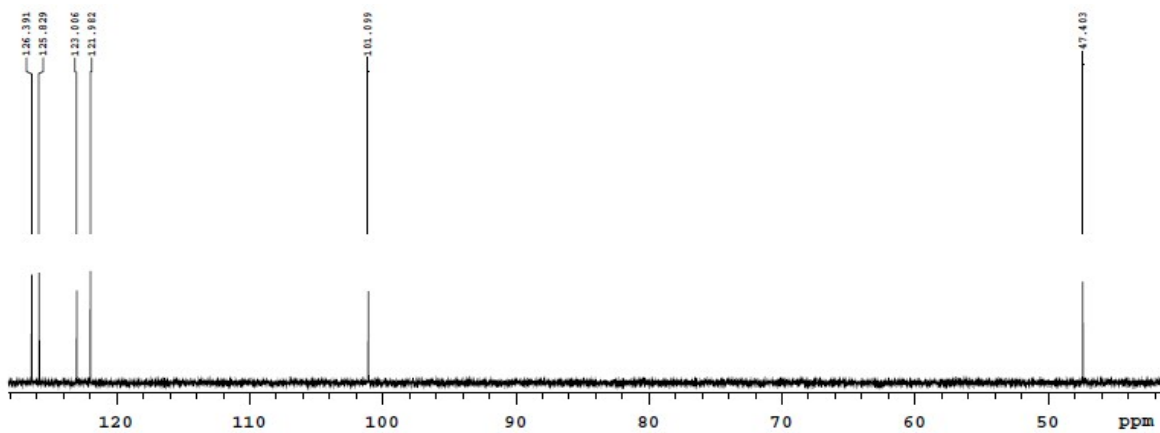

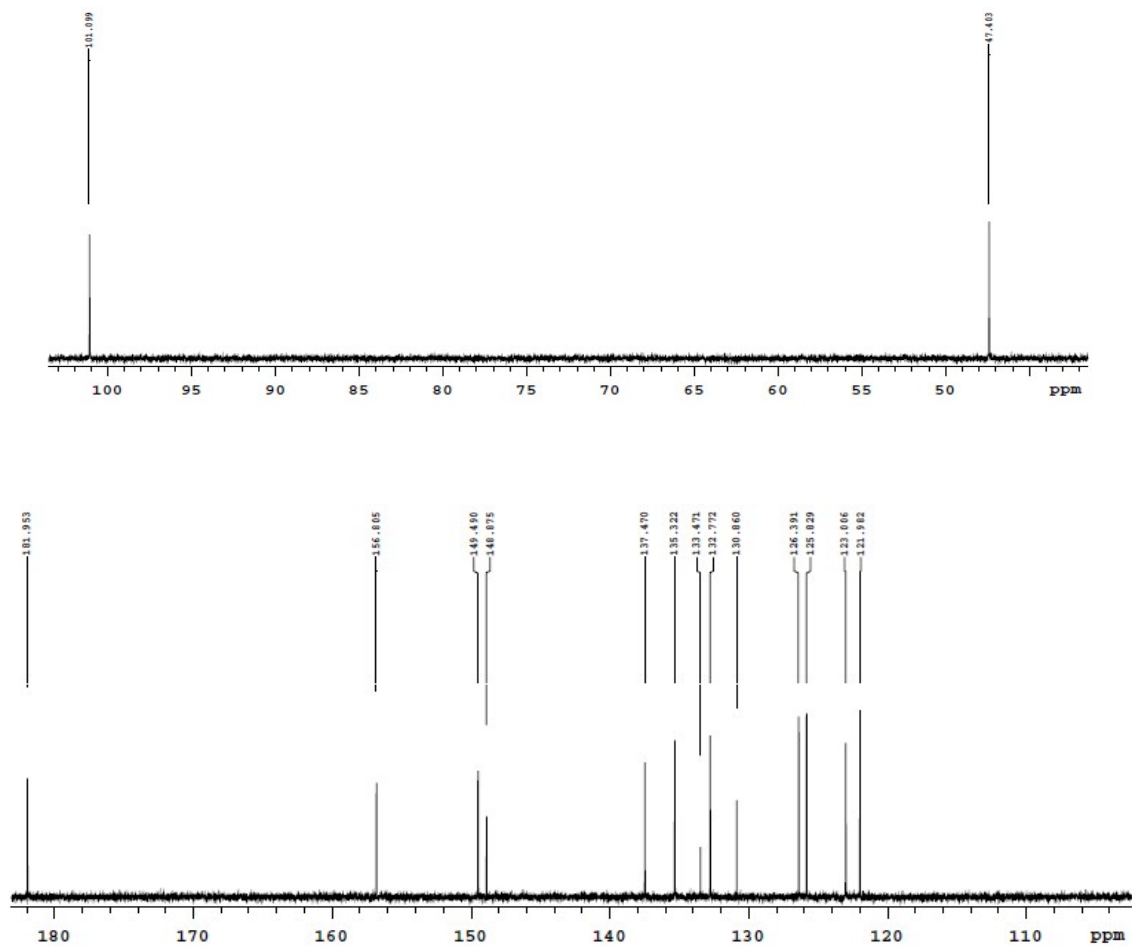

**Fig. S2** a) <sup>1</sup>H and b) <sup>13</sup>C NMR spectra of **H-1** in DMSO-*d*<sub>6</sub> solvent.

a)

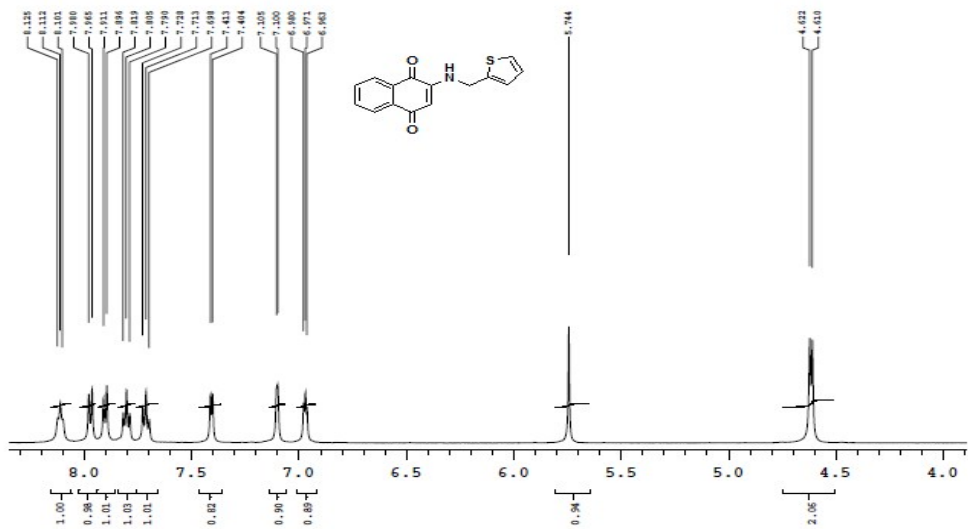

b)

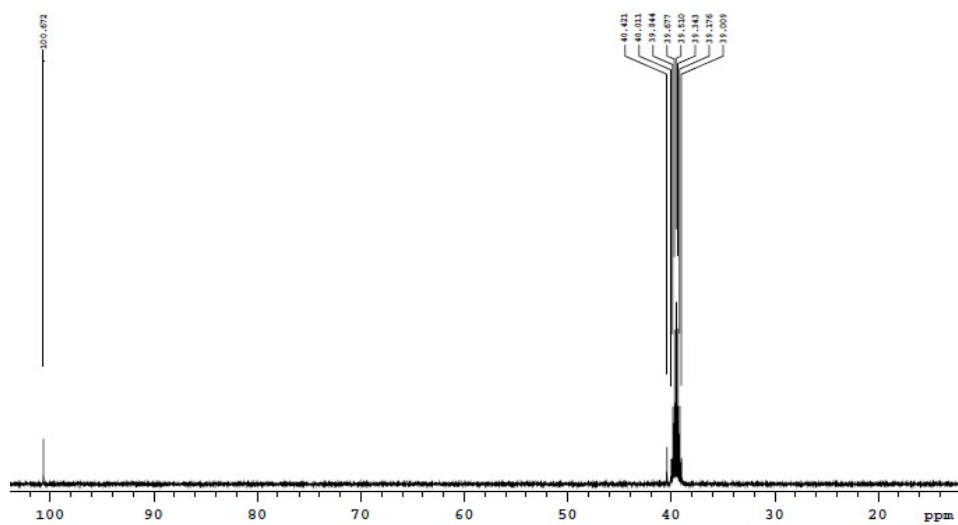

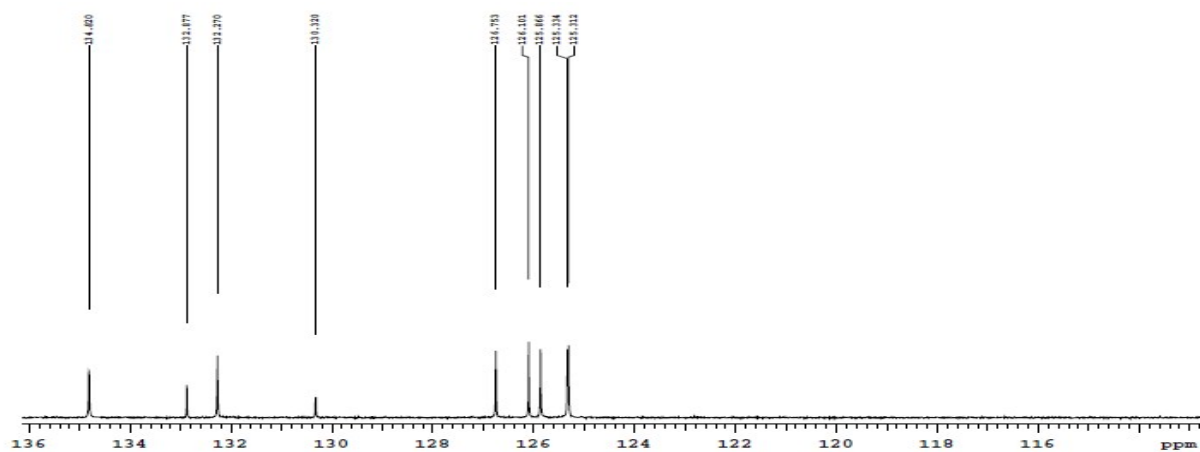

**Fig. S3** a)  $^1\text{H}$ , b)  $^{13}\text{C}$  NMR spectra of **H-2** in  $\text{DMSO-}d_6$  solvent

a)

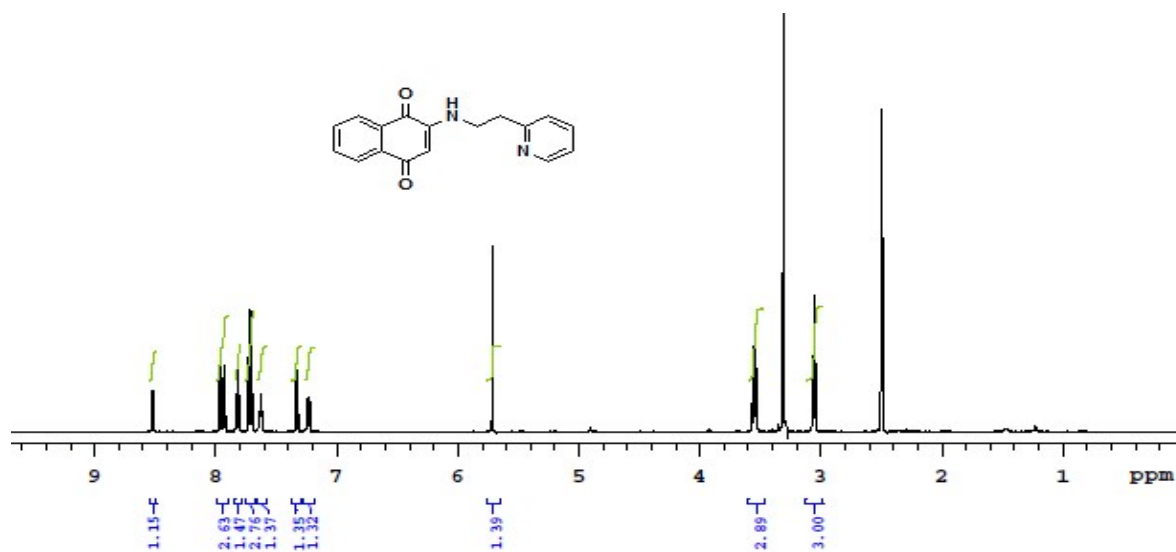

b)

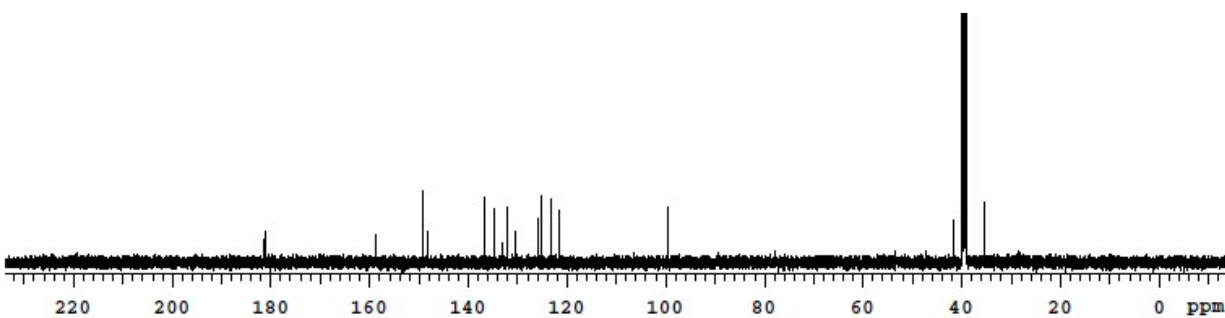

**Fig.S4** a) <sup>1</sup>H and b) <sup>13</sup>C NMR spectra of **H-3** in DMSO-*d*<sub>6</sub>.



a)

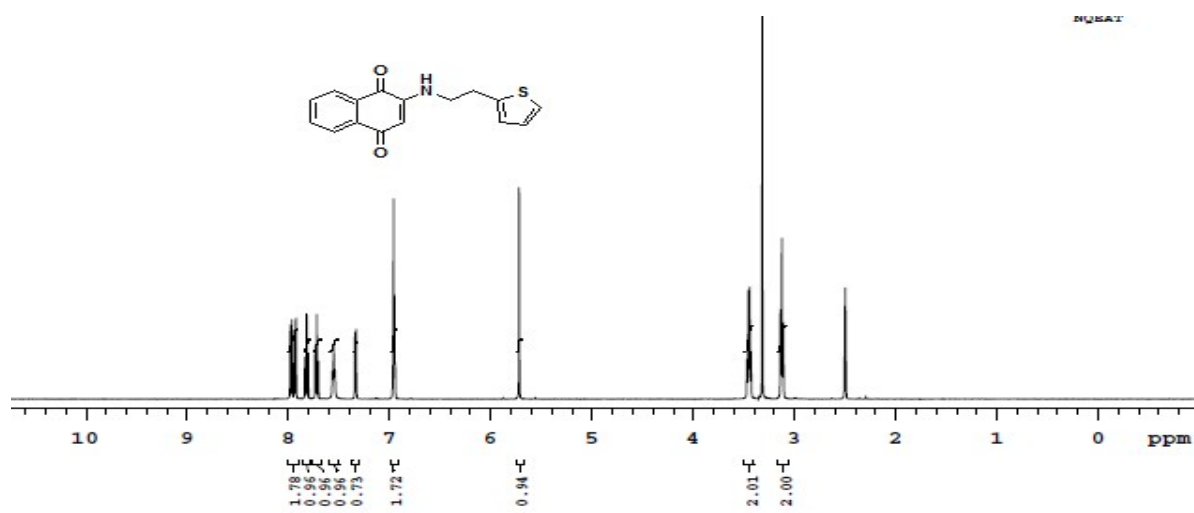

b)

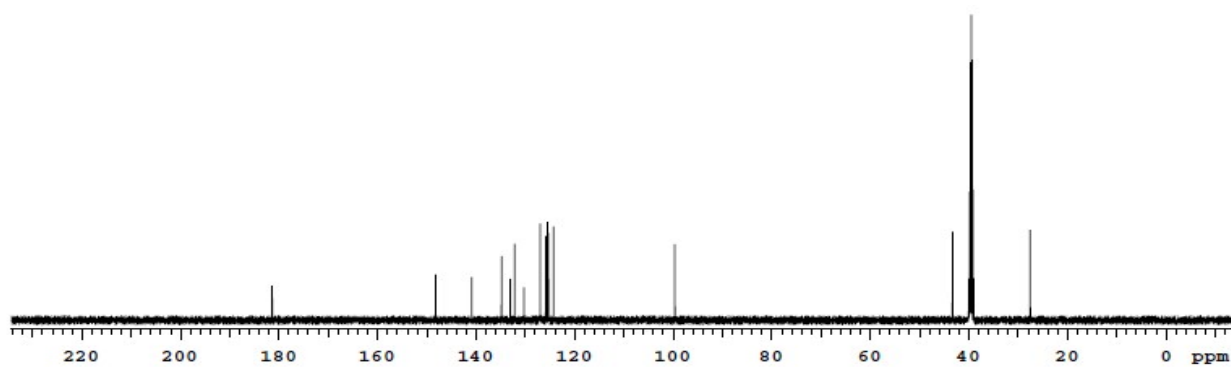

**Fig. S5** a)  $^1\text{H}$  and b)  $^{13}\text{C}$  NMR spectra of **H-4** in  $\text{DMSO-}d_6$  solvent.

# H-1

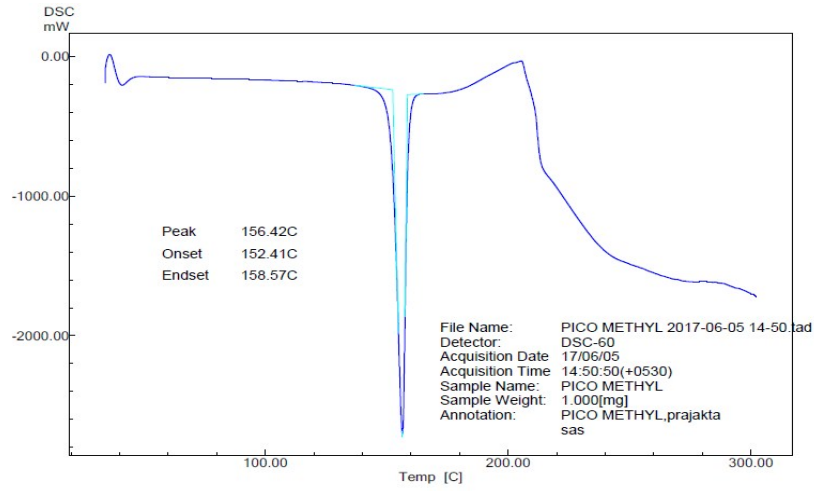

# H-2

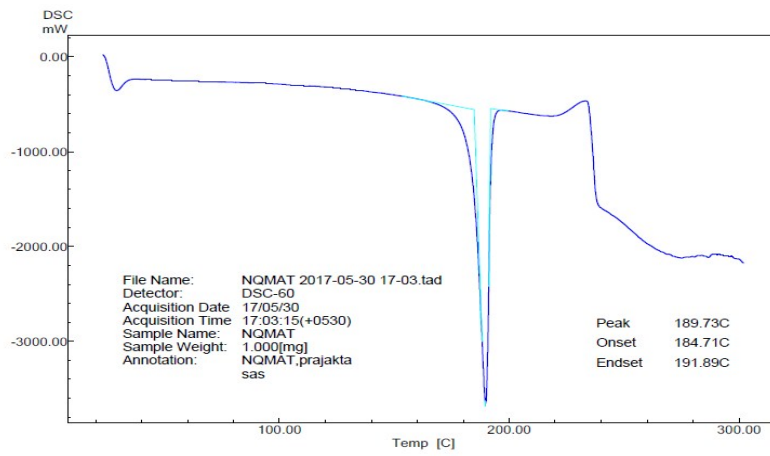

### H-3

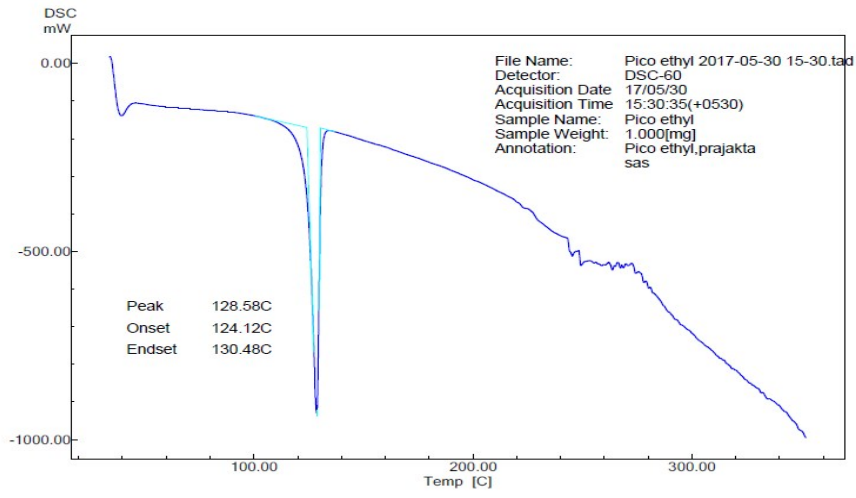

### H-4

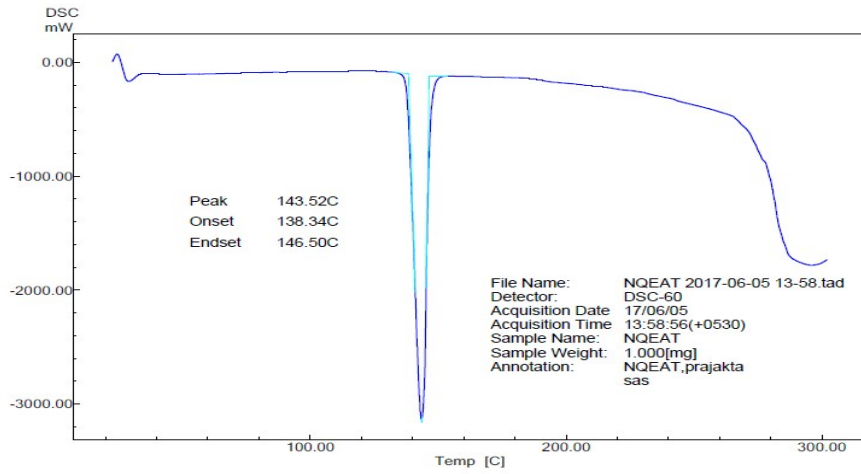

**Fig. S6** DSC plot of H-1, H-2, H-3 and H-4

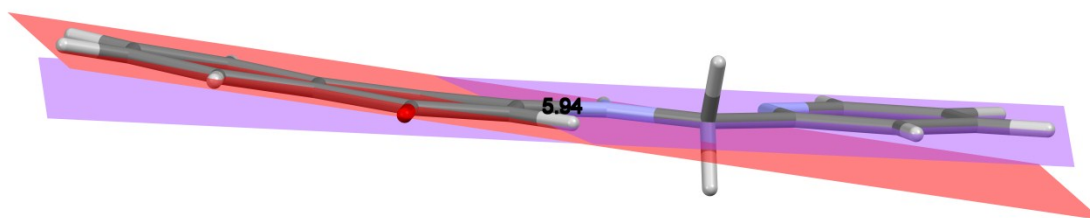

**Fig. S7** Figure showing planarity of naphthoquinone and pyridyl ring of chemosensor H-1

a)

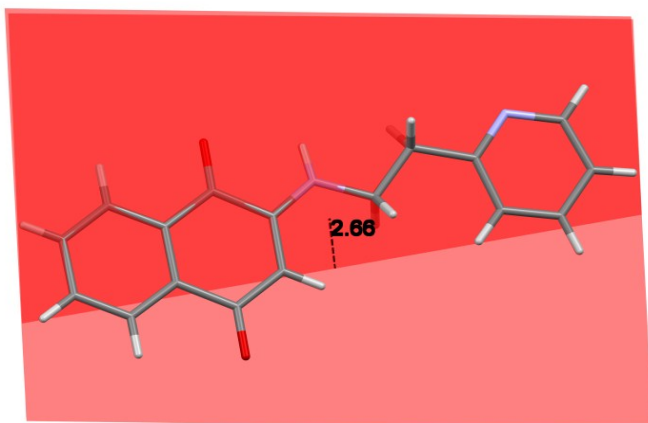

b)

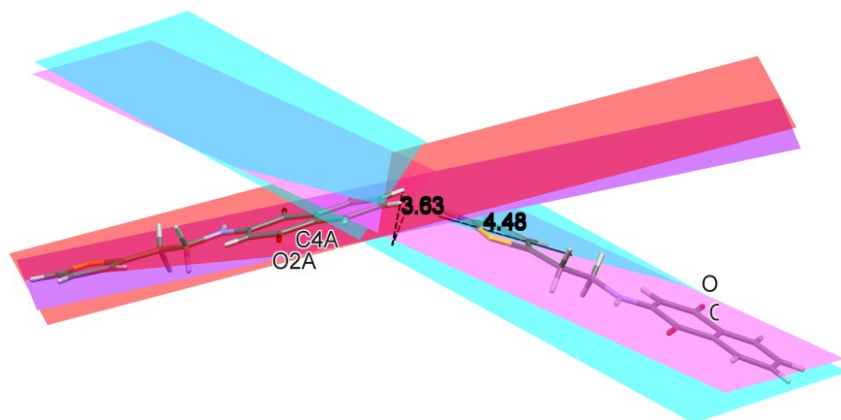

**Fig. S8** Figure showing planarity of naphthoquinone and pyridyl ring of H-3 (a) and H-4 (b)

a)

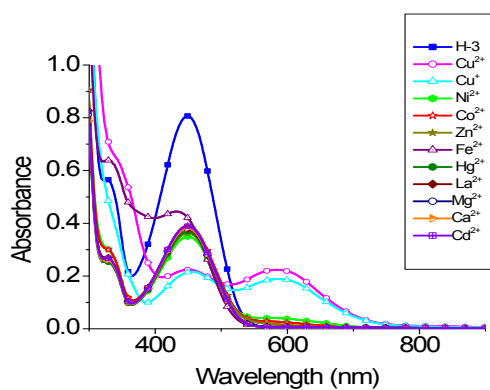

b)

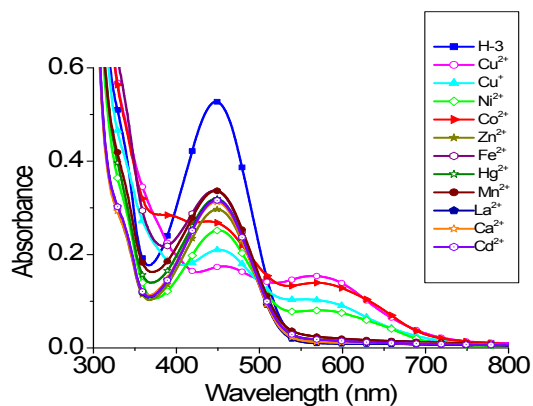

b)

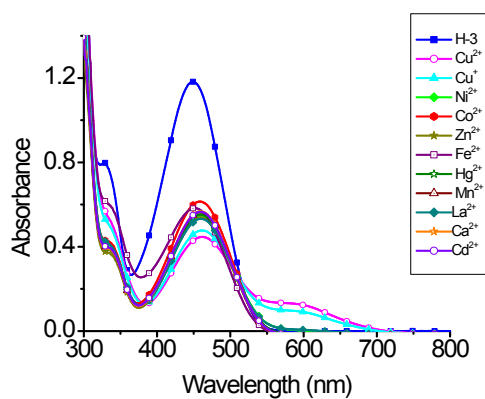

d)

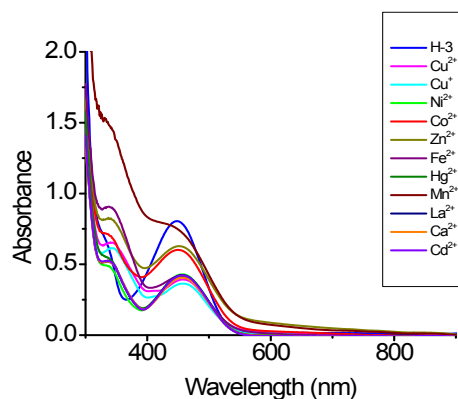

**Fig. S9** a) UV-Visible spectra of H-3 in presence of various metal ions in methanol. b) UV-Visible spectra of H-3 in presence of various metal ions in methanol-triethylamine. c) UV-Visible spectra of H-3 in presence of various metal ions in methanol: water media. d) UV-Visible spectra of H-3 in presence of various metal ions in methanol-TEA-water

### Zn<sup>2+</sup>

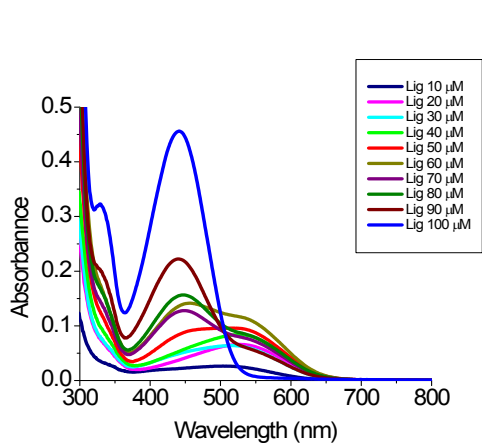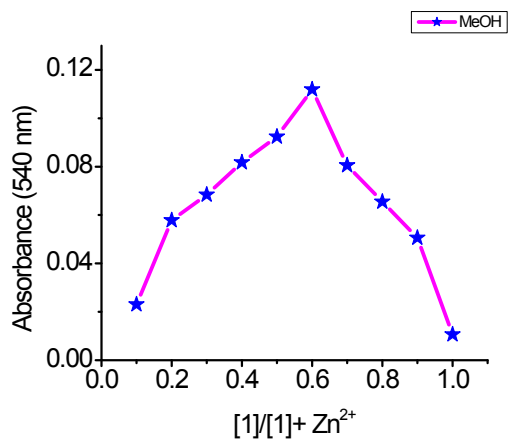

### Cu<sup>2+</sup>

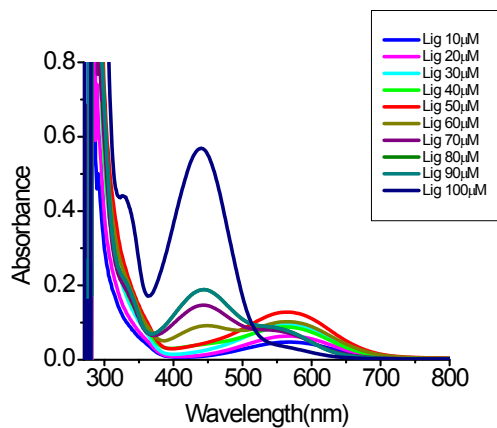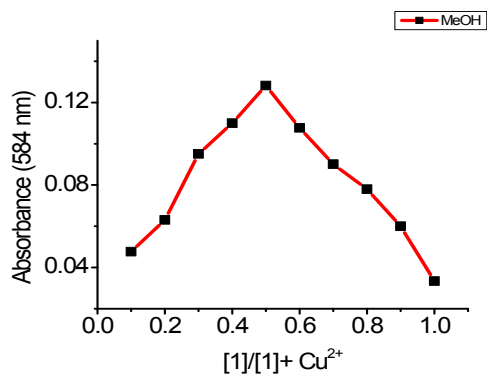

### Cu<sup>+</sup>

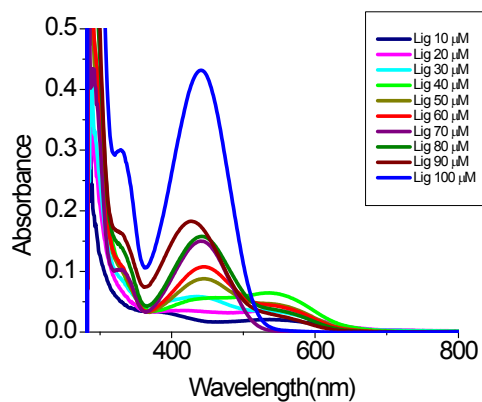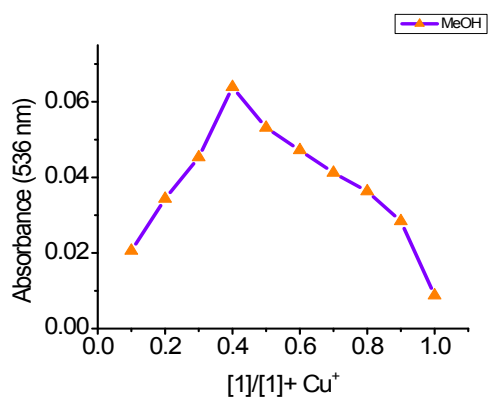

$\text{Ni}^{2+}$

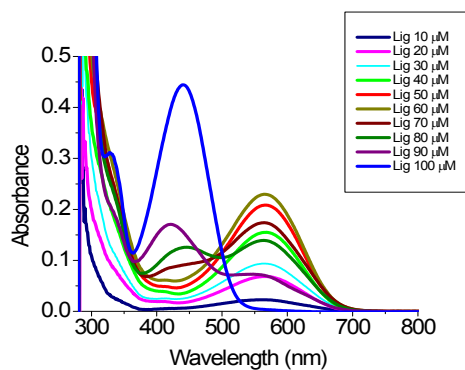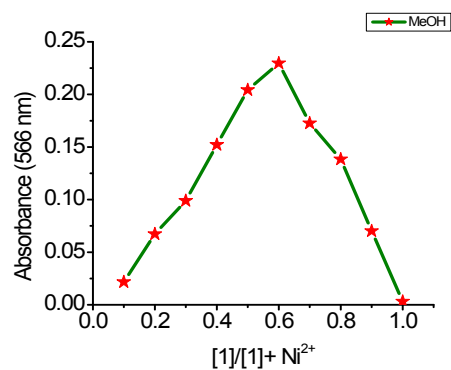

$\text{Co}^{2+}$

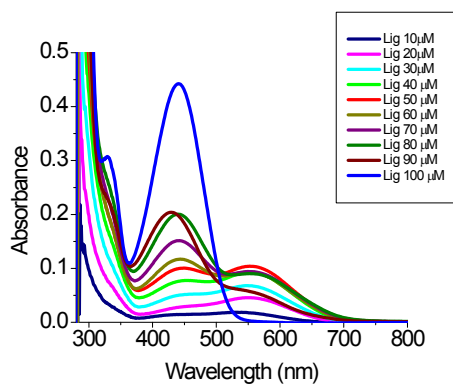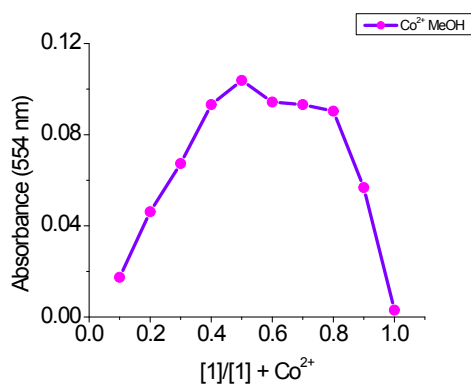

**Fig. S10** Job's plot experiment for H-1 and  $\text{Cu}^{2+}$ ,  $\text{Cu}^+$ ,  $\text{Ni}^{2+}$ ,  $\text{Co}^{2+}$  and  $\text{Zn}^{2+}$  in methanol.



Zn<sup>2+</sup>

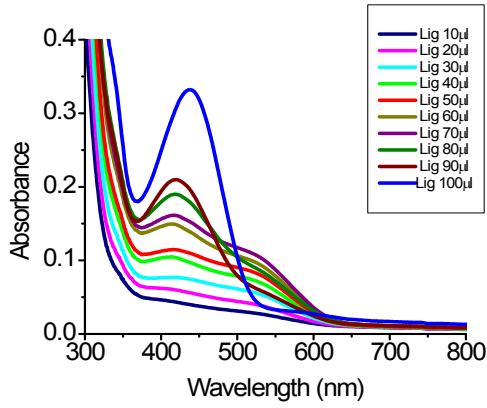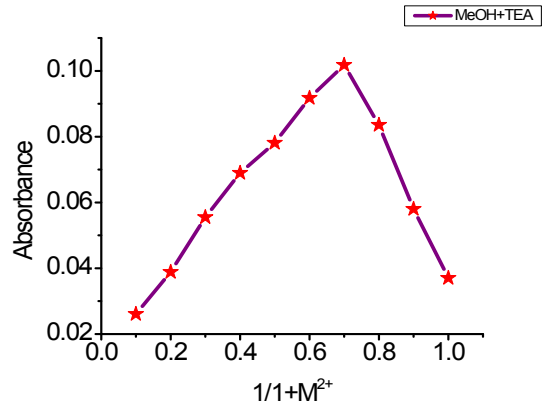

Ni<sup>2+</sup>

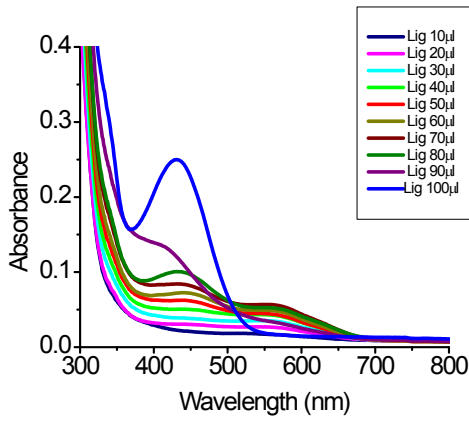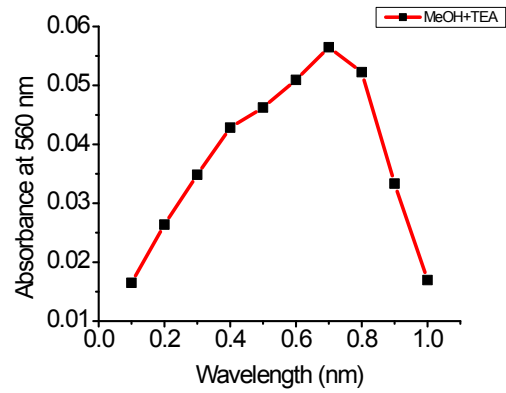

Co<sup>2+</sup>

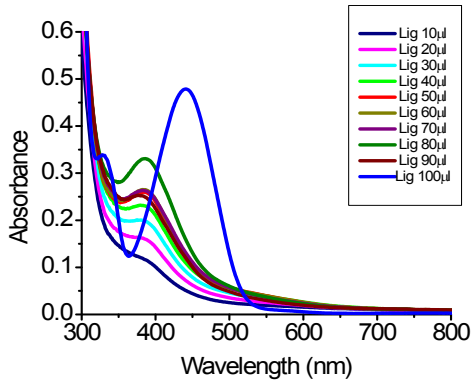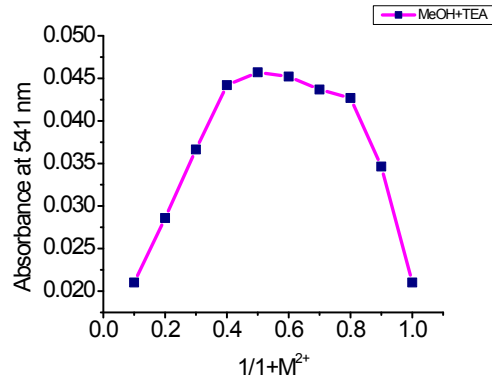

**Fig. S11** Job's plot experiment for H-1 and  $Zn^{2+}$ ,  $Ni^{2+}$  and  $Co^{2+}$  in methanol + TEA mixture.

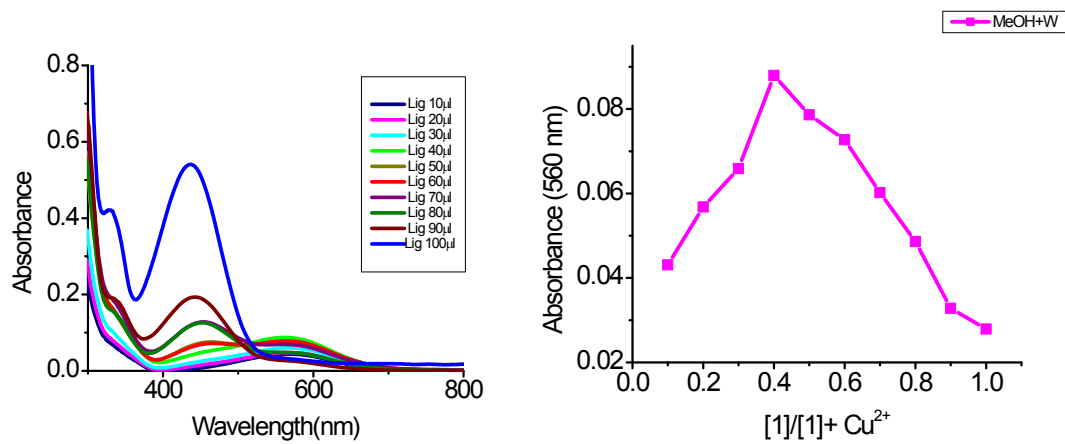

**Fig S12** Job's plot experiment for H-1 and  $Cu^{2+}$  in methanol: water mixture

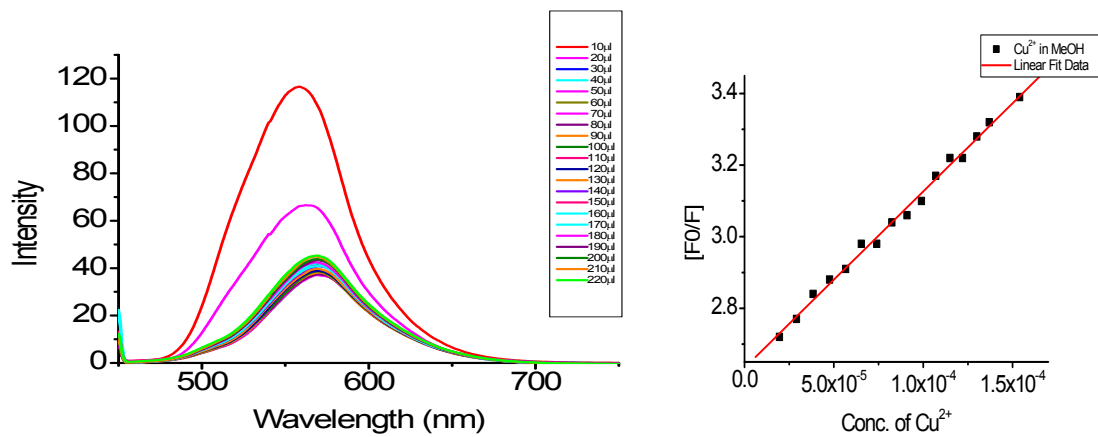

Fig. S13 a) Association constant experiment of Cu<sup>2+</sup> in methanol with H-1

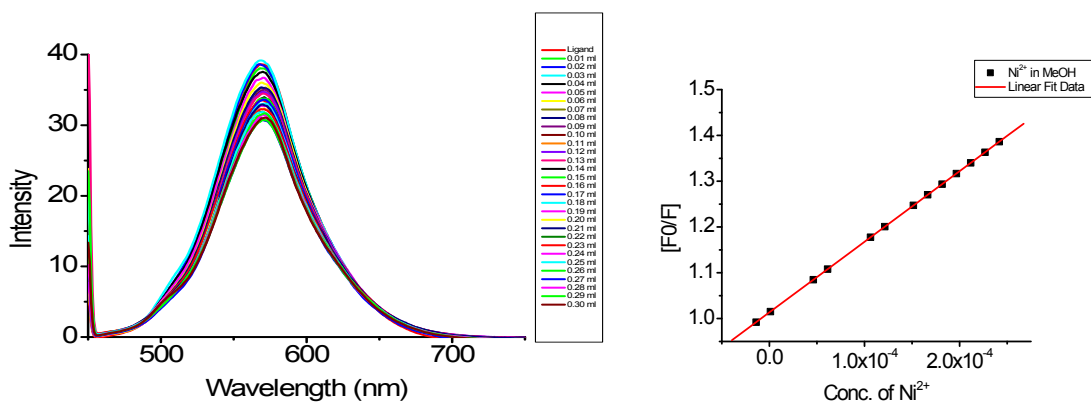

Fig. S13 b) Association constant experiment of Ni<sup>2+</sup> in methanol with H-1

$\text{Cu}^{2+}$

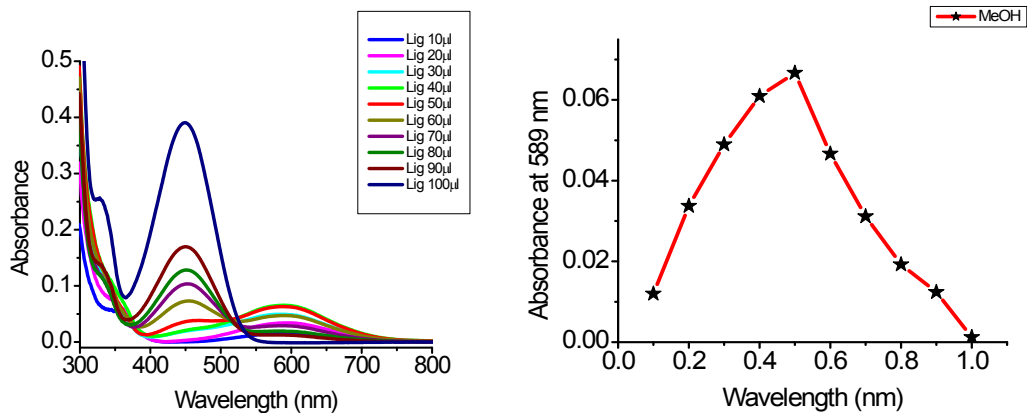

$\text{Ni}^{2+}$

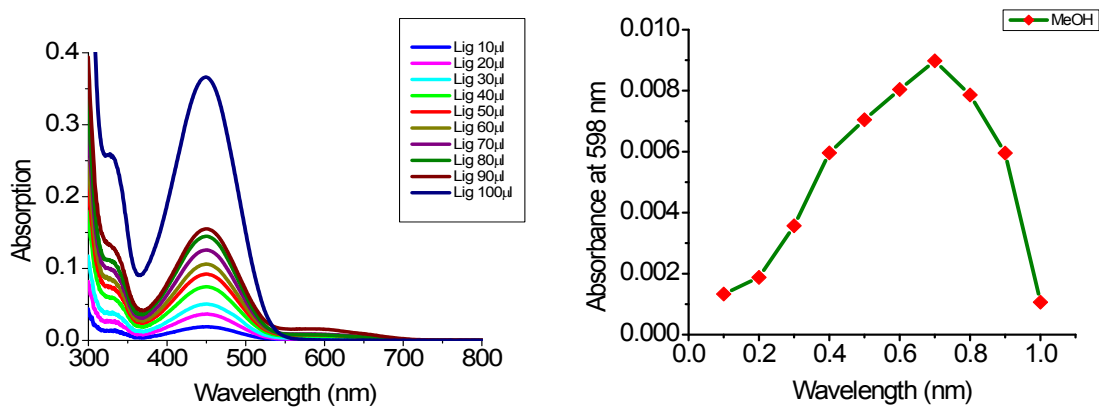

**Fig.S14** Job's plot experiment for H-3 and  $\text{Cu}^{2+}$  and  $\text{Ni}^{2+}$  in methanol.

**Cu<sup>2+</sup>**

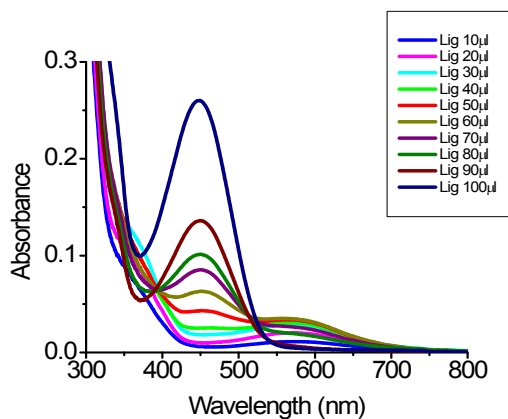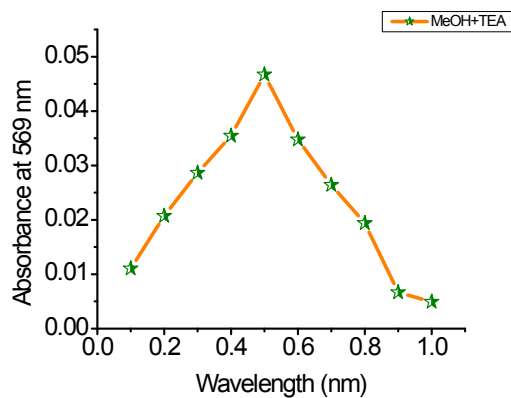

**Ni<sup>2+</sup>**

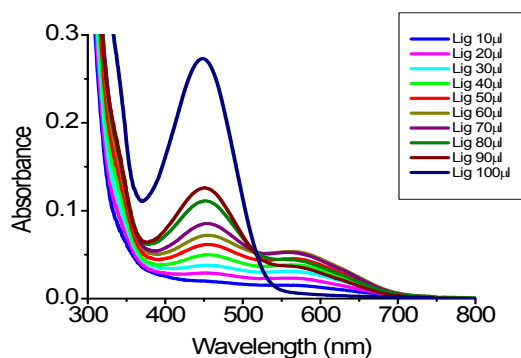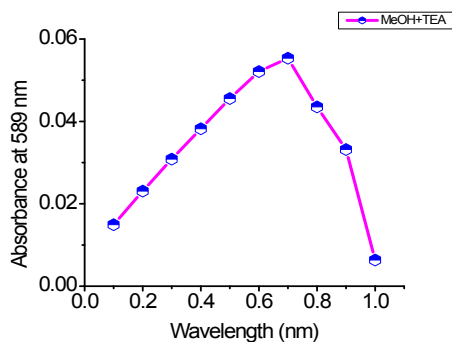

**Co<sup>2+</sup>**

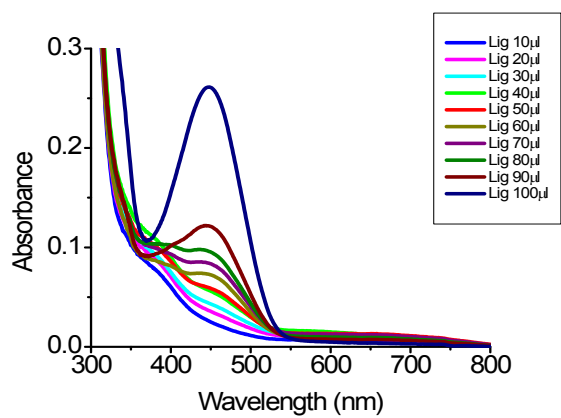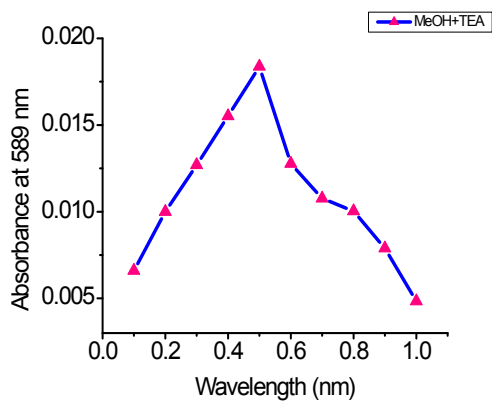

**Fig. S15** Job's plot experiment for H-3 and Cu<sup>2+</sup>, Ni<sup>2+</sup> and Co<sup>2+</sup> in methanol:triethylamine

$\text{Cu}^{2+}$

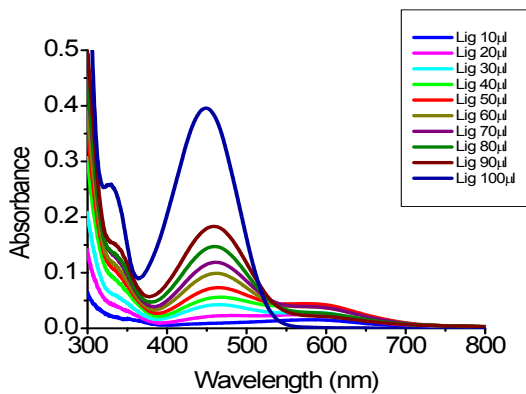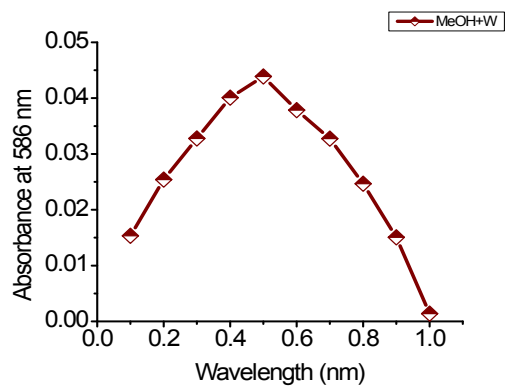

$\text{Cu}^{+}$

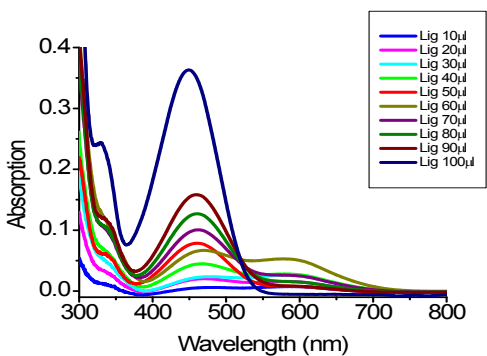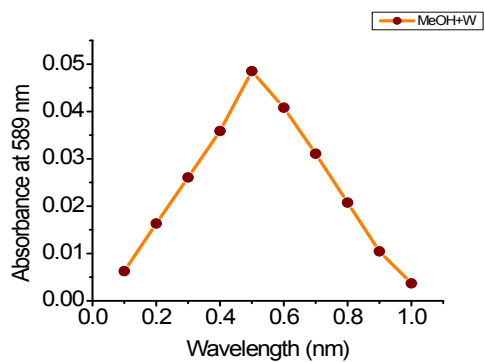

**Fig.S16** Job's plot experiment for H-3 and  $\text{Cu}^{2+}$  and  $\text{Cu}^{+}$  in methanol :water.

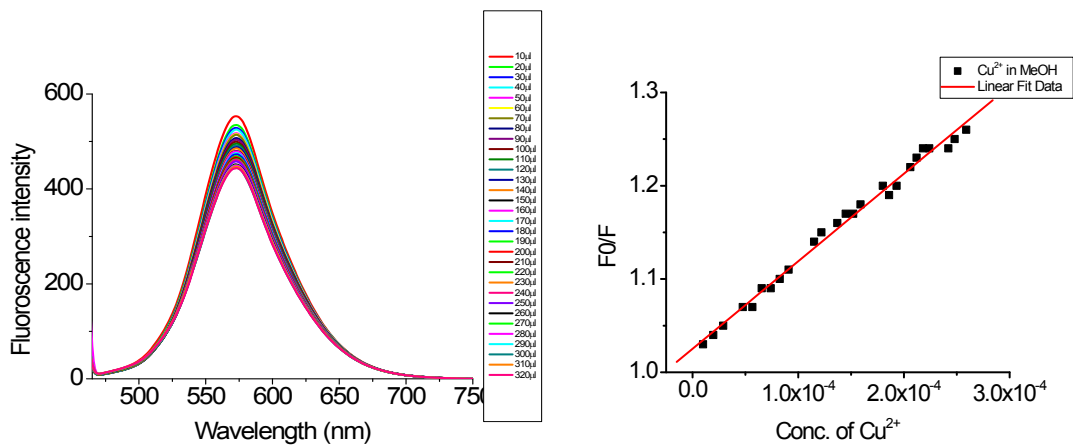

**Fig. S17 a)** Cu<sup>2+</sup> in methanol association constant graph for H-3

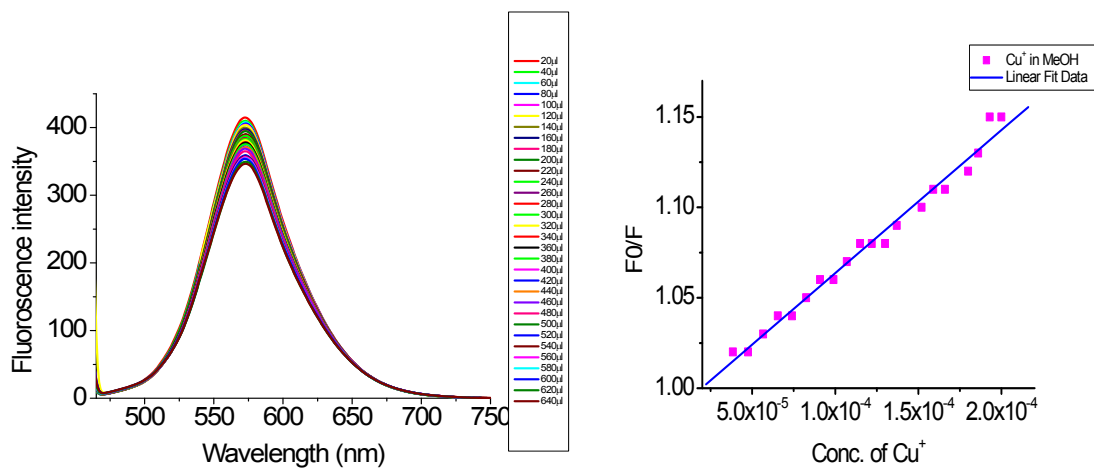

**Fig. S17 b)** Cu<sup>+</sup> in methanol association constant graph for H-3.

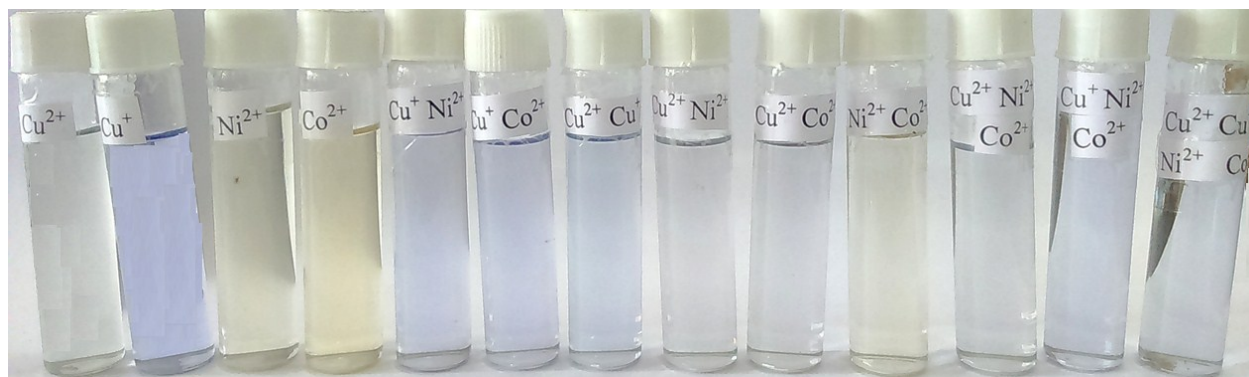

**Fig. S18** Color changes observed to Chemosensor H-3 and metal ions ( $1 \times 10^{-4}$  M) in methanol



a)

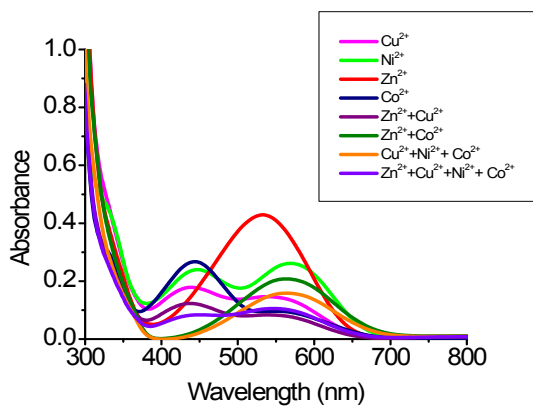

b)

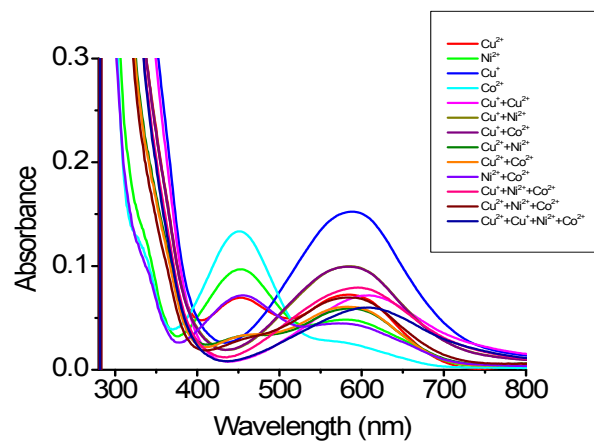

**Fig. S19** (a) UV-visible of competitive binding of selected metal ions with chemosensor H-1 in methanol. b) UV-visible of competitive binding of selected metal ions with chemosensor H-3 in methanol.

a)

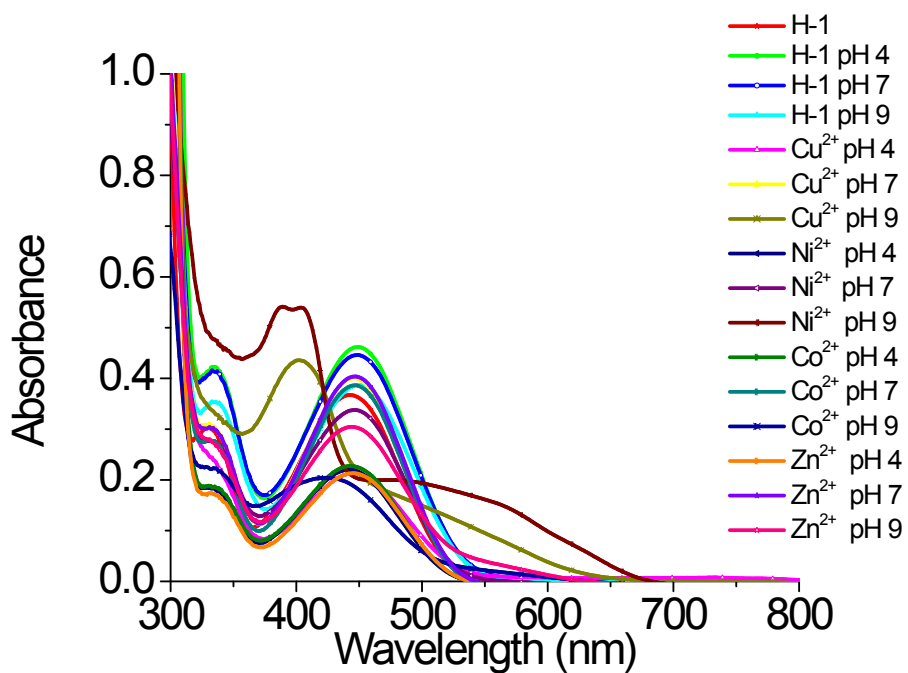

b)

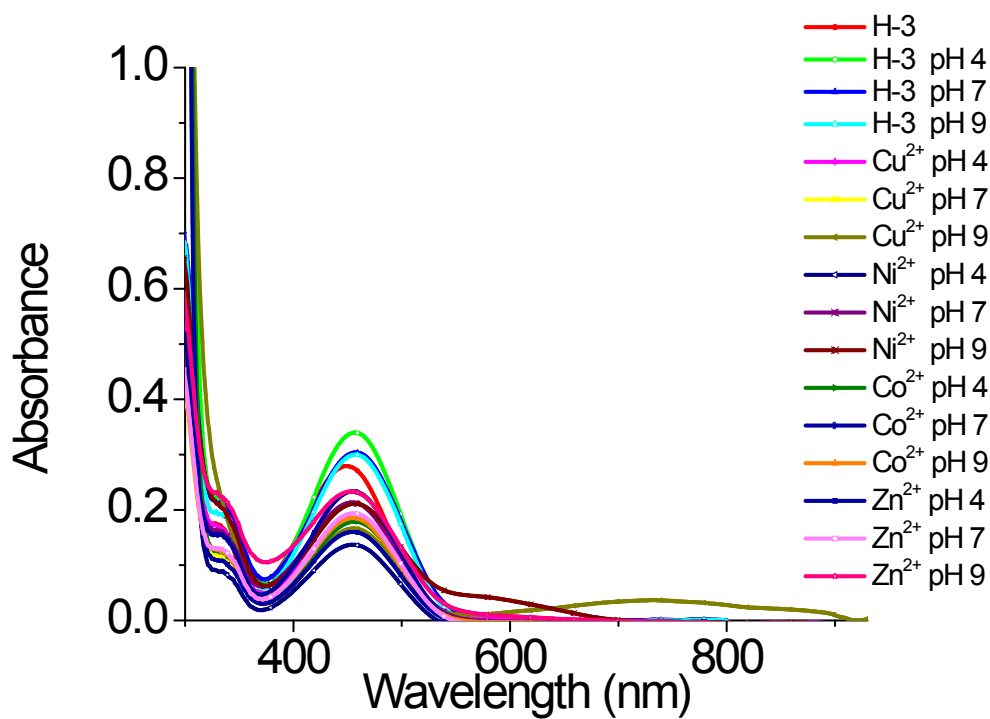

**Fig.S20** pH dependent binding studies for metal ions Zn<sup>2+</sup>, Cu<sup>2+</sup> and Ni<sup>2+</sup> of ligands a) H-1 and b) H-3.

a)

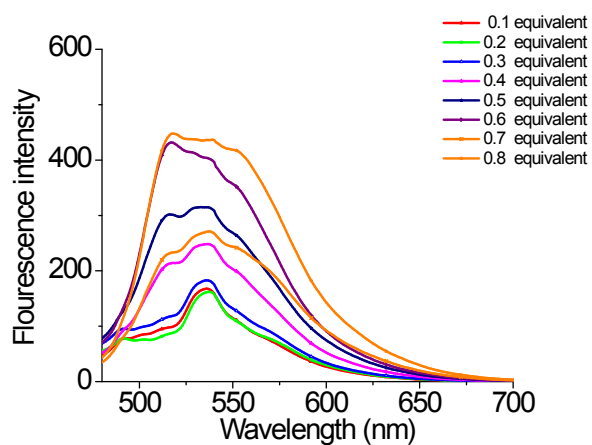

b)

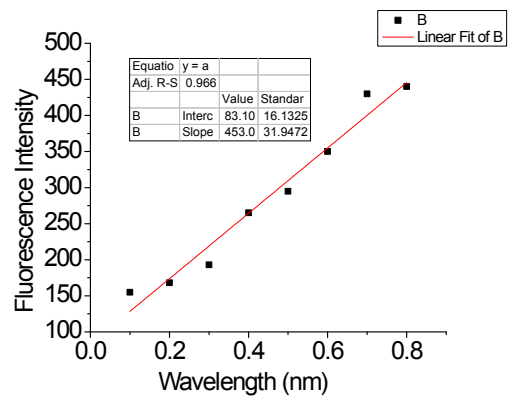

**Fig. S21** a) Fluorescence spectra of H-1 with an increasing concentration of Cu<sup>2+</sup> b) plot of the intensity at 462 nm for mixture of the H-1 and Cu<sup>2+</sup> in methanol.

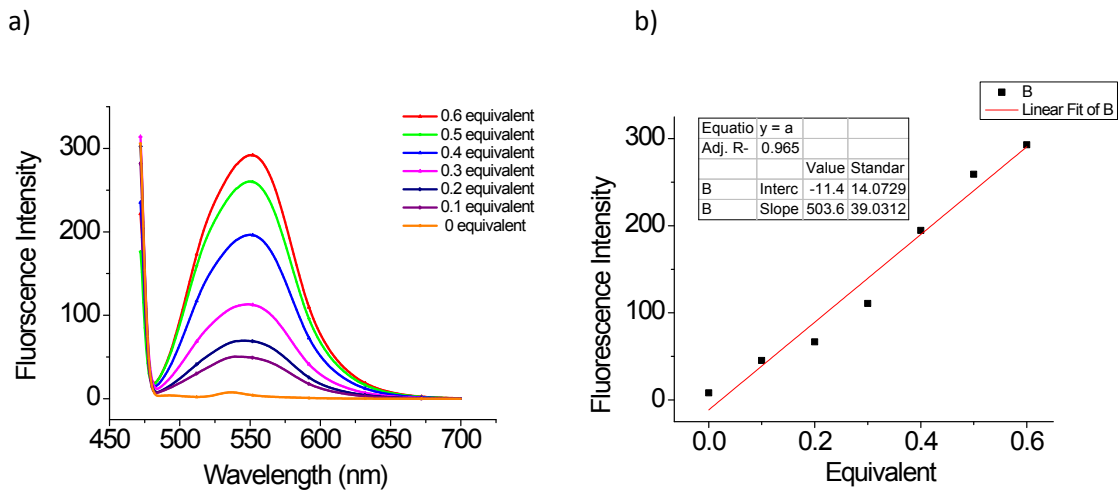

**Fig.S22** a) Fluorescence spectra of H-3 with an increasing concentration of  $\text{Cu}^{2+}$  b) plot of the intensity at 462 nm for mixture of the H-3 and  $\text{Cu}^{2+}$  in methanol.

Table S1 Atomic coordinates ( $\times 10^4$ ) and equivalent isotropic displacement parameters ( $\text{\AA}^2 \times 10^3$ ) for H-1.  $U(\text{eq})$  is defined as one third of the trace of the orthogonalized  $U^{ij}$  tensor.

|       | x       | y        | z        | $U(\text{eq})$ |
|-------|---------|----------|----------|----------------|
| O(1)  | 7394(1) | 2411(1)  | 1286(1)  | 18(1)          |
| O(2)  | -552(1) | -987(1)  | 1100(1)  | 21(1)          |
| N(1)  | 5129(2) | 2262(1)  | 348(1)   | 14(1)          |
| N(2)  | 7423(2) | 3942(1)  | -325(1)  | 15(1)          |
| C(1)  | 5682(2) | 1543(1)  | 1246(1)  | 13(1)          |
| C(2)  | 4232(2) | 1457(1)  | 738(1)   | 13(1)          |
| C(3)  | 2166(2) | 627(1)   | 702(1)   | 15(1)          |
| C(4)  | 1326(2) | -257(1)  | 1132(1)  | 14(1)          |
| C(5)  | 2128(2) | -1236(1) | 2044(1)  | 16(1)          |
| C(6)  | 3545(2) | -1334(1) | 2501(1)  | 19(1)          |
| C(7)  | 5642(2) | -484(1)  | 2552(1)  | 20(1)          |
| C(8)  | 6321(2) | 472(1)   | 2146(1)  | 17(1)          |
| C(9)  | 4916(2) | 558(1)   | 1684(1)  | 13(1)          |
| C(10) | 2814(2) | -299(1)  | 1631(1)  | 13(1)          |
| C(11) | 3973(2) | 2359(1)  | -167(1)  | 14(1)          |
| C(12) | 5417(2) | 3325(1)  | -528(1)  | 13(1)          |
| C(13) | 4634(2) | 3536(1)  | -1048(1) | 15(1)          |
| C(14) | 6012(2) | 4421(1)  | -1368(1) | 15(1)          |
| C(15) | 8097(2) | 5071(1)  | -1163(1) | 15(1)          |
| C(16) | 8724(2) | 4801(1)  | -642(1)  | 16(1)          |

Table S2 Bond lengths [ $\text{\AA}$ ] and angles [ $^\circ$ ] for H-1.

---

|              |            |
|--------------|------------|
| O(1)-C(1)    | 1.2196(13) |
| O(2)-C(4)    | 1.2342(13) |
| N(1)-C(2)    | 1.3354(13) |
| N(1)-C(11)   | 1.4455(13) |
| N(1)-H(1)    | 0.8800     |
| N(2)-C(12)   | 1.3359(13) |
| N(2)-C(16)   | 1.3442(14) |
| C(1)-C(9)    | 1.4841(14) |
| C(1)-C(2)    | 1.5066(14) |
| C(2)-C(3)    | 1.3694(14) |
| C(3)-C(4)    | 1.4363(15) |
| C(3)-H(3)    | 0.9500     |
| C(4)-C(10)   | 1.4994(15) |
| C(5)-C(6)    | 1.3894(16) |
| C(5)-C(10)   | 1.3948(15) |
| C(5)-H(5)    | 0.9500     |
| C(6)-C(7)    | 1.3943(16) |
| C(6)-H(6)    | 0.9500     |
| C(7)-C(8)    | 1.3882(16) |
| C(7)-H(7)    | 0.9500     |
| C(8)-C(9)    | 1.3975(15) |
| C(8)-H(8)    | 0.9500     |
| C(9)-C(10)   | 1.3999(14) |
| C(11)-C(12)  | 1.5120(14) |
| C(11)-H(11A) | 0.9900     |
| C(11)-H(11B) | 0.9900     |
| C(12)-C(13)  | 1.3960(14) |
| C(13)-C(14)  | 1.3870(15) |
| C(13)-H(13)  | 0.9500     |
| C(14)-C(15)  | 1.3873(15) |
| C(14)-H(14)  | 0.9500     |
| C(15)-C(16)  | 1.3842(15) |
| C(15)-H(15)  | 0.9500     |
| C(16)-H(16)  | 0.9500     |

|                  |            |
|------------------|------------|
| C(2)-N(1)-C(11)  | 122.70(9)  |
| C(2)-N(1)-H(1)   | 118.6      |
| C(11)-N(1)-H(1)  | 118.6      |
| C(12)-N(2)-C(16) | 117.60(9)  |
| O(1)-C(1)-C(9)   | 122.66(10) |
| O(1)-C(1)-C(2)   | 120.01(9)  |
| C(9)-C(1)-C(2)   | 117.32(9)  |
| N(1)-C(2)-C(3)   | 125.01(10) |
| N(1)-C(2)-C(1)   | 114.23(9)  |
| C(3)-C(2)-C(1)   | 120.76(9)  |
| C(2)-C(3)-C(4)   | 122.46(10) |
| C(2)-C(3)-H(3)   | 118.8      |
| C(4)-C(3)-H(3)   | 118.8      |
| O(2)-C(4)-C(3)   | 122.29(10) |
| O(2)-C(4)-C(10)  | 119.50(10) |
| C(3)-C(4)-C(10)  | 118.21(9)  |
| C(6)-C(5)-C(10)  | 120.03(10) |
| C(6)-C(5)-H(5)   | 120.0      |
| C(10)-C(5)-H(5)  | 120.0      |
| C(5)-C(6)-C(7)   | 120.26(10) |
| C(5)-C(6)-H(6)   | 119.9      |
| C(7)-C(6)-H(6)   | 119.9      |
| C(8)-C(7)-C(6)   | 120.15(10) |
| C(8)-C(7)-H(7)   | 119.9      |
| C(6)-C(7)-H(7)   | 119.9      |
| C(7)-C(8)-C(9)   | 119.77(10) |
| C(7)-C(8)-H(8)   | 120.1      |
| C(9)-C(8)-H(8)   | 120.1      |
| C(8)-C(9)-C(10)  | 120.15(10) |
| C(8)-C(9)-C(1)   | 119.65(9)  |
| C(10)-C(9)-C(1)  | 120.19(9)  |
| C(5)-C(10)-C(9)  | 119.63(10) |
| C(5)-C(10)-C(4)  | 119.61(9)  |
| C(9)-C(10)-C(4)  | 120.73(9)  |
| N(1)-C(11)-C(12) | 110.78(8)  |

|                     |            |
|---------------------|------------|
| N(1)-C(11)-H(11A)   | 109.5      |
| C(12)-C(11)-H(11A)  | 109.5      |
| N(1)-C(11)-H(11B)   | 109.5      |
| C(12)-C(11)-H(11B)  | 109.5      |
| H(11A)-C(11)-H(11B) | 108.1      |
| N(2)-C(12)-C(13)    | 123.01(9)  |
| N(2)-C(12)-C(11)    | 117.02(9)  |
| C(13)-C(12)-C(11)   | 119.97(9)  |
| C(14)-C(13)-C(12)   | 118.36(9)  |
| C(14)-C(13)-H(13)   | 120.8      |
| C(12)-C(13)-H(13)   | 120.8      |
| C(13)-C(14)-C(15)   | 119.26(10) |
| C(13)-C(14)-H(14)   | 120.4      |
| C(15)-C(14)-H(14)   | 120.4      |
| C(16)-C(15)-C(14)   | 118.20(10) |
| C(16)-C(15)-H(15)   | 120.9      |
| C(14)-C(15)-H(15)   | 120.9      |
| N(2)-C(16)-C(15)    | 123.55(10) |
| N(2)-C(16)-H(16)    | 118.2      |
| C(15)-C(16)-H(16)   | 118.2      |

---

Symmetry transformations used to generate equivalent atoms:



Table S3 Anisotropic displacement parameters ( $\text{\AA}^2 \times 10^3$ ) for H-1. The anisotropic displacement factor exponent takes the form:  $-2\pi^2[ h^2 a^{*2} U^{11} + \dots + 2 h k a^* b^* U^{12} ]$

|       | $U^{11}$ | $U^{22}$ | $U^{33}$ | $U^{23}$ | $U^{13}$ | $U^{12}$ |
|-------|----------|----------|----------|----------|----------|----------|
| O(1)  | 16(1)    | 19(1)    | 19(1)    | 2(1)     | -2(1)    | -6(1)    |
| O(2)  | 19(1)    | 23(1)    | 20(1)    | 0(1)     | 0(1)     | -10(1)   |
| N(1)  | 14(1)    | 16(1)    | 13(1)    | 2(1)     | -1(1)    | -5(1)    |
| N(2)  | 14(1)    | 17(1)    | 14(1)    | 0(1)     | 0(1)     | -2(1)    |
| C(1)  | 13(1)    | 12(1)    | 14(1)    | -1(1)    | 1(1)     | 0(1)     |
| C(2)  | 14(1)    | 11(1)    | 13(1)    | 0(1)     | 1(1)     | 0(1)     |
| C(3)  | 17(1)    | 16(1)    | 13(1)    | 0(1)     | -1(1)    | -3(1)    |
| C(4)  | 14(1)    | 13(1)    | 16(1)    | -2(1)    | 1(1)     | -3(1)    |
| C(5)  | 17(1)    | 16(1)    | 16(1)    | -1(1)    | 5(1)     | -2(1)    |
| C(6)  | 22(1)    | 20(1)    | 15(1)    | 3(1)     | 5(1)     | 0(1)     |
| C(7)  | 21(1)    | 26(1)    | 13(1)    | 2(1)     | 0(1)     | 1(1)     |
| C(8)  | 14(1)    | 20(1)    | 16(1)    | 0(1)     | 0(1)     | -1(1)    |
| C(9)  | 13(1)    | 13(1)    | 12(1)    | -1(1)    | 2(1)     | 1(1)     |
| C(10) | 14(1)    | 12(1)    | 13(1)    | -2(1)    | 3(1)     | 0(1)     |
| C(11) | 14(1)    | 16(1)    | 12(1)    | 1(1)     | -1(1)    | -3(1)    |
| C(12) | 13(1)    | 11(1)    | 14(1)    | -1(1)    | 1(1)     | 0(1)     |
| C(13) | 14(1)    | 15(1)    | 14(1)    | -1(1)    | -1(1)    | -2(1)    |
| C(14) | 18(1)    | 16(1)    | 12(1)    | 0(1)     | -1(1)    | 0(1)     |
| C(15) | 15(1)    | 16(1)    | 15(1)    | 1(1)     | 3(1)     | -2(1)    |
| C(16) | 13(1)    | 18(1)    | 16(1)    | 0(1)     | -1(1)    | -4(1)    |

Table S4 Torsion angles [°] for H-1.

---

|                        |             |
|------------------------|-------------|
| C(11)-N(1)-C(2)-C(3)   | 0.57(17)    |
| C(11)-N(1)-C(2)-C(1)   | -178.42(9)  |
| O(1)-C(1)-C(2)-N(1)    | 6.24(14)    |
| C(9)-C(1)-C(2)-N(1)    | -174.47(9)  |
| O(1)-C(1)-C(2)-C(3)    | -172.80(10) |
| C(9)-C(1)-C(2)-C(3)    | 6.50(14)    |
| N(1)-C(2)-C(3)-C(4)    | 178.05(10)  |
| C(1)-C(2)-C(3)-C(4)    | -3.02(16)   |
| C(2)-C(3)-C(4)-O(2)    | 179.07(10)  |
| C(2)-C(3)-C(4)-C(10)   | -1.61(16)   |
| C(10)-C(5)-C(6)-C(7)   | 0.79(17)    |
| C(5)-C(6)-C(7)-C(8)    | 0.25(18)    |
| C(6)-C(7)-C(8)-C(9)    | -1.08(17)   |
| C(7)-C(8)-C(9)-C(10)   | 0.87(16)    |
| C(7)-C(8)-C(9)-C(1)    | -178.20(10) |
| O(1)-C(1)-C(9)-C(8)    | -7.03(16)   |
| C(2)-C(1)-C(9)-C(8)    | 173.70(9)   |
| O(1)-C(1)-C(9)-C(10)   | 173.91(10)  |
| C(2)-C(1)-C(9)-C(10)   | -5.37(14)   |
| C(6)-C(5)-C(10)-C(9)   | -1.00(16)   |
| C(6)-C(5)-C(10)-C(4)   | 177.30(10)  |
| C(8)-C(9)-C(10)-C(5)   | 0.17(15)    |
| C(1)-C(9)-C(10)-C(5)   | 179.23(9)   |
| C(8)-C(9)-C(10)-C(4)   | -178.11(9)  |
| C(1)-C(9)-C(10)-C(4)   | 0.95(15)    |
| O(2)-C(4)-C(10)-C(5)   | 3.75(15)    |
| C(3)-C(4)-C(10)-C(5)   | -175.59(10) |
| O(2)-C(4)-C(10)-C(9)   | -177.97(10) |
| C(3)-C(4)-C(10)-C(9)   | 2.69(15)    |
| C(2)-N(1)-C(11)-C(12)  | -179.10(9)  |
| C(16)-N(2)-C(12)-C(13) | 0.01(16)    |
| C(16)-N(2)-C(12)-C(11) | 179.89(9)   |
| N(1)-C(11)-C(12)-N(2)  | -1.24(13)   |
| N(1)-C(11)-C(12)-C(13) | 178.64(9)   |

|                         |             |
|-------------------------|-------------|
| N(2)-C(12)-C(13)-C(14)  | 0.32(16)    |
| C(11)-C(12)-C(13)-C(14) | -179.56(10) |
| C(12)-C(13)-C(14)-C(15) | -0.45(16)   |
| C(13)-C(14)-C(15)-C(16) | 0.27(16)    |
| C(12)-N(2)-C(16)-C(15)  | -0.22(16)   |
| C(14)-C(15)-C(16)-N(2)  | 0.07(17)    |

---

Symmetry transformations used to generate equivalent atoms:

Table S5 Hydrogen bonds for H-1[Å and °].

| D-H...A               | d(D-H) | d(H...A) | d(D...A)   | <(DHA) |
|-----------------------|--------|----------|------------|--------|
| C(16)-H(16)...N(2)#1  | 0.95   | 2.56     | 3.3915(14) | 146.5  |
| C(15)-H(15)...O(1)#1  | 0.95   | 2.58     | 3.3634(13) | 140.2  |
| C(13)-H(13)...O(2)#2  | 0.95   | 2.34     | 3.1655(13) | 145.1  |
| C(11)-H(11B)...O(2)#2 | 0.99   | 2.66     | 3.2198(13) | 116.1  |
| C(11)-H(11B)...O(2)#2 | 0.99   | 2.66     | 3.2198(13) | 116.1  |
| C(13)-H(13)...O(2)#2  | 0.95   | 2.34     | 3.1655(13) | 145.1  |
| C(15)-H(15)...O(1)#1  | 0.95   | 2.58     | 3.3634(13) | 140.2  |
| C(16)-H(16)...N(2)#1  | 0.95   | 2.56     | 3.3915(14) | 146.5  |

Symmetry transformations used to generate equivalent atoms:

#1 -x+2,-y+1,-z #2 -x,-y,-z

Table S6 Atomic coordinates ( $\times 10^4$ ) and equivalent isotropic displacement parameters ( $\text{\AA}^2 \times 10^3$ ) for H-3.  $U(\text{eq})$  is defined as one third of the trace of the orthogonalized  $U^{ij}$  tensor.

|       | x        | y        | z        | $U(\text{eq})$ |
|-------|----------|----------|----------|----------------|
| O(1)  | 1638(2)  | -469(1)  | 5171(2)  | 12(1)          |
| O(2)  | 10655(2) | -638(1)  | 9052(2)  | 14(1)          |
| N(1)  | 3473(3)  | 232(1)   | 6992(2)  | 10(1)          |
| N(2)  | 961(3)   | 1730(1)  | 8168(2)  | 13(1)          |
| C(1)  | 3669(3)  | -519(1)  | 6063(2)  | 8(1)           |
| C(2)  | 4858(3)  | -140(1)  | 7122(2)  | 9(1)           |
| C(3)  | 7180(3)  | -184(1)  | 8099(2)  | 10(1)          |
| C(4)  | 8572(3)  | -594(1)  | 8171(2)  | 9(1)           |
| C(5)  | 8760(3)  | -1380(1) | 7166(2)  | 12(1)          |
| C(6)  | 7746(4)  | -1739(1) | 6200(2)  | 14(1)          |
| C(7)  | 5396(4)  | -1703(1) | 5199(2)  | 13(1)          |
| C(8)  | 4047(3)  | -1309(1) | 5174(2)  | 10(1)          |
| C(9)  | 5059(3)  | -947(1)  | 6140(2)  | 9(1)           |
| C(10) | 7437(3)  | -982(1)  | 7140(2)  | 9(1)           |
| C(11) | 4266(3)  | 633(1)   | 7961(2)  | 9(1)           |
| C(12) | 2186(3)  | 979(1)   | 7662(2)  | 9(1)           |
| C(13) | 2796(3)  | 1423(1)  | 8505(2)  | 9(1)           |
| C(14) | 5065(3)  | 1514(1)  | 9548(2)  | 13(1)          |
| C(15) | 5439(4)  | 1933(1)  | 10267(2) | 15(1)          |
| C(16) | 3565(4)  | 2250(1)  | 9935(2)  | 14(1)          |
| C(17) | 1372(4)  | 2131(1)  | 8876(2)  | 14(1)          |

Table S7 Bond lengths [Å] and angles [°] for H-3.

---

|              |          |
|--------------|----------|
| O(1)-C(1)    | 1.220(2) |
| O(2)-C(4)    | 1.237(2) |
| N(1)-C(2)    | 1.339(2) |
| N(1)-C(11)   | 1.459(2) |
| N(1)-H(1)    | 0.8800   |
| N(2)-C(17)   | 1.335(2) |
| N(2)-C(13)   | 1.348(2) |
| C(1)-C(9)    | 1.484(2) |
| C(1)-C(2)    | 1.504(2) |
| C(2)-C(3)    | 1.375(2) |
| C(3)-C(4)    | 1.437(2) |
| C(3)-H(3)    | 0.9500   |
| C(4)-C(10)   | 1.503(2) |
| C(5)-C(6)    | 1.388(3) |
| C(5)-C(10)   | 1.392(3) |
| C(5)-H(5)    | 0.9500   |
| C(6)-C(7)    | 1.394(3) |
| C(6)-H(6)    | 0.9500   |
| C(7)-C(8)    | 1.387(3) |
| C(7)-H(7)    | 0.9500   |
| C(8)-C(9)    | 1.397(2) |
| C(8)-H(8)    | 0.9500   |
| C(9)-C(10)   | 1.405(2) |
| C(11)-C(12)  | 1.521(2) |
| C(11)-H(11A) | 0.9900   |
| C(11)-H(11B) | 0.9900   |
| C(12)-C(13)  | 1.509(2) |
| C(12)-H(12A) | 0.9900   |
| C(12)-H(12B) | 0.9900   |
| C(13)-C(14)  | 1.396(3) |
| C(14)-C(15)  | 1.387(3) |
| C(14)-H(14)  | 0.9500   |
| C(15)-C(16)  | 1.384(3) |
| C(15)-H(15)  | 0.9500   |

|                  |            |
|------------------|------------|
| C(16)-C(17)      | 1.391(3)   |
| C(16)-H(16)      | 0.9500     |
| C(17)-H(17)      | 0.9500     |
| <br>             |            |
| C(2)-N(1)-C(11)  | 122.20(15) |
| C(2)-N(1)-H(1)   | 118.9      |
| C(11)-N(1)-H(1)  | 118.9      |
| C(17)-N(2)-C(13) | 117.65(16) |
| O(1)-C(1)-C(9)   | 122.10(16) |
| O(1)-C(1)-C(2)   | 120.19(16) |
| C(9)-C(1)-C(2)   | 117.71(15) |
| N(1)-C(2)-C(3)   | 124.94(17) |
| N(1)-C(2)-C(1)   | 113.90(15) |
| C(3)-C(2)-C(1)   | 121.15(16) |
| C(2)-C(3)-C(4)   | 121.96(17) |
| C(2)-C(3)-H(3)   | 119.0      |
| C(4)-C(3)-H(3)   | 119.0      |
| O(2)-C(4)-C(3)   | 122.44(17) |
| O(2)-C(4)-C(10)  | 119.09(16) |
| C(3)-C(4)-C(10)  | 118.46(15) |
| C(6)-C(5)-C(10)  | 120.19(17) |
| C(6)-C(5)-H(5)   | 119.9      |
| C(10)-C(5)-H(5)  | 119.9      |
| C(7)-C(6)-C(5)   | 120.29(18) |
| C(7)-C(6)-H(6)   | 119.9      |
| C(5)-C(6)-H(6)   | 119.9      |
| C(6)-C(7)-C(8)   | 120.10(18) |
| C(6)-C(7)-H(7)   | 120.0      |
| C(8)-C(7)-H(7)   | 120.0      |
| C(7)-C(8)-C(9)   | 119.90(17) |
| C(7)-C(8)-H(8)   | 120.1      |
| C(9)-C(8)-H(8)   | 120.1      |
| C(8)-C(9)-C(10)  | 120.01(16) |
| C(8)-C(9)-C(1)   | 120.09(16) |
| C(10)-C(9)-C(1)  | 119.86(16) |
| C(5)-C(10)-C(9)  | 119.51(16) |

|                     |            |
|---------------------|------------|
| C(5)-C(10)-C(4)     | 119.67(16) |
| C(9)-C(10)-C(4)     | 120.83(16) |
| N(1)-C(11)-C(12)    | 109.42(14) |
| N(1)-C(11)-H(11A)   | 109.8      |
| C(12)-C(11)-H(11A)  | 109.8      |
| N(1)-C(11)-H(11B)   | 109.8      |
| C(12)-C(11)-H(11B)  | 109.8      |
| H(11A)-C(11)-H(11B) | 108.2      |
| C(13)-C(12)-C(11)   | 115.53(14) |
| C(13)-C(12)-H(12A)  | 108.4      |
| C(11)-C(12)-H(12A)  | 108.4      |
| C(13)-C(12)-H(12B)  | 108.4      |
| C(11)-C(12)-H(12B)  | 108.4      |
| H(12A)-C(12)-H(12B) | 107.5      |
| N(2)-C(13)-C(14)    | 122.24(17) |
| N(2)-C(13)-C(12)    | 114.42(15) |
| C(14)-C(13)-C(12)   | 123.34(16) |
| C(15)-C(14)-C(13)   | 118.86(17) |
| C(15)-C(14)-H(14)   | 120.6      |
| C(13)-C(14)-H(14)   | 120.6      |
| C(16)-C(15)-C(14)   | 119.42(18) |
| C(16)-C(15)-H(15)   | 120.3      |
| C(14)-C(15)-H(15)   | 120.3      |
| C(15)-C(16)-C(17)   | 117.75(18) |
| C(15)-C(16)-H(16)   | 121.1      |
| C(17)-C(16)-H(16)   | 121.1      |
| N(2)-C(17)-C(16)    | 124.07(18) |
| N(2)-C(17)-H(17)    | 118.0      |
| C(16)-C(17)-H(17)   | 118.0      |

---

Symmetry transformations used to generate equivalent atoms:



Table S8 Anisotropic displacement parameters ( $\text{\AA}^2 \times 10^3$ ) for H-3. The anisotropic displacement factor exponent takes the form:  $-2\pi^2 [ h^2 a^{*2} U^{11} + \dots + 2 h k a^* b^* U^{12} ]$

|       | $U^{11}$ | $U^{22}$ | $U^{33}$ | $U^{23}$ | $U^{13}$ | $U^{12}$ |
|-------|----------|----------|----------|----------|----------|----------|
| O(1)  | 9(1)     | 12(1)    | 13(1)    | -1(1)    | -2(1)    | 1(1)     |
| O(2)  | 10(1)    | 16(1)    | 13(1)    | 0(1)     | -4(1)    | 2(1)     |
| N(1)  | 8(1)     | 9(1)     | 12(1)    | -1(1)    | -2(1)    | 1(1)     |
| N(2)  | 12(1)    | 14(1)    | 14(1)    | -2(1)    | 0(1)     | 3(1)     |
| C(1)  | 8(1)     | 11(1)    | 7(1)     | 2(1)     | 2(1)     | -1(1)    |
| C(2)  | 9(1)     | 9(1)     | 9(1)     | 0(1)     | 3(1)     | 0(1)     |
| C(3)  | 9(1)     | 9(1)     | 10(1)    | -1(1)    | 0(1)     | -2(1)    |
| C(4)  | 10(1)    | 10(1)    | 8(1)     | 2(1)     | 1(1)     | 0(1)     |
| C(5)  | 10(1)    | 13(1)    | 13(1)    | 2(1)     | 1(1)     | 1(1)     |
| C(6)  | 16(1)    | 10(1)    | 18(1)    | 1(1)     | 4(1)     | 3(1)     |
| C(7)  | 15(1)    | 9(1)     | 15(1)    | -1(1)    | 2(1)     | -4(1)    |
| C(8)  | 9(1)     | 11(1)    | 11(1)    | 0(1)     | 1(1)     | -3(1)    |
| C(9)  | 9(1)     | 9(1)     | 8(1)     | 1(1)     | 2(1)     | 0(1)     |
| C(10) | 9(1)     | 10(1)    | 8(1)     | 2(1)     | 1(1)     | 0(1)     |
| C(11) | 9(1)     | 8(1)     | 10(1)    | -1(1)    | -2(1)    | 1(1)     |
| C(12) | 7(1)     | 11(1)    | 10(1)    | -1(1)    | 0(1)     | -1(1)    |
| C(13) | 11(1)    | 9(1)     | 8(1)     | 0(1)     | 3(1)     | 1(1)     |
| C(14) | 10(1)    | 12(1)    | 15(1)    | -1(1)    | 0(1)     | 2(1)     |
| C(15) | 12(1)    | 15(1)    | 16(1)    | -2(1)    | -1(1)    | -1(1)    |
| C(16) | 19(1)    | 9(1)     | 14(1)    | -2(1)    | 4(1)     | -1(1)    |
| C(17) | 16(1)    | 13(1)    | 14(1)    | -1(1)    | 1(1)     | 6(1)     |

Table S9 Torsion angles [°] for H-3.

---

|                        |             |
|------------------------|-------------|
| C(11)-N(1)-C(2)-C(3)   | -2.9(3)     |
| C(11)-N(1)-C(2)-C(1)   | 178.03(15)  |
| O(1)-C(1)-C(2)-N(1)    | 1.1(2)      |
| C(9)-C(1)-C(2)-N(1)    | -179.38(15) |
| O(1)-C(1)-C(2)-C(3)    | -178.07(17) |
| C(9)-C(1)-C(2)-C(3)    | 1.5(2)      |
| N(1)-C(2)-C(3)-C(4)    | -179.60(17) |
| C(1)-C(2)-C(3)-C(4)    | -0.6(3)     |
| C(2)-C(3)-C(4)-O(2)    | -179.58(17) |
| C(2)-C(3)-C(4)-C(10)   | 0.1(3)      |
| C(10)-C(5)-C(6)-C(7)   | 0.0(3)      |
| C(5)-C(6)-C(7)-C(8)    | -0.6(3)     |
| C(6)-C(7)-C(8)-C(9)    | 0.7(3)      |
| C(7)-C(8)-C(9)-C(10)   | -0.2(3)     |
| C(7)-C(8)-C(9)-C(1)    | 177.43(17)  |
| O(1)-C(1)-C(9)-C(8)    | -0.1(3)     |
| C(2)-C(1)-C(9)-C(8)    | -179.63(16) |
| O(1)-C(1)-C(9)-C(10)   | 177.58(17)  |
| C(2)-C(1)-C(9)-C(10)   | -2.0(2)     |
| C(6)-C(5)-C(10)-C(9)   | 0.5(3)      |
| C(6)-C(5)-C(10)-C(4)   | -179.10(17) |
| C(8)-C(9)-C(10)-C(5)   | -0.4(3)     |
| C(1)-C(9)-C(10)-C(5)   | -178.06(16) |
| C(8)-C(9)-C(10)-C(4)   | 179.21(16)  |
| C(1)-C(9)-C(10)-C(4)   | 1.6(3)      |
| O(2)-C(4)-C(10)-C(5)   | -1.3(3)     |
| C(3)-C(4)-C(10)-C(5)   | 179.03(17)  |
| O(2)-C(4)-C(10)-C(9)   | 179.09(17)  |
| C(3)-C(4)-C(10)-C(9)   | -0.6(2)     |
| C(2)-N(1)-C(11)-C(12)  | -174.53(16) |
| N(1)-C(11)-C(12)-C(13) | -176.52(15) |
| C(17)-N(2)-C(13)-C(14) | -0.2(3)     |
| C(17)-N(2)-C(13)-C(12) | 179.90(16)  |
| C(11)-C(12)-C(13)-N(2) | 177.50(16)  |

|                         |             |
|-------------------------|-------------|
| C(11)-C(12)-C(13)-C(14) | -2.4(3)     |
| N(2)-C(13)-C(14)-C(15)  | 0.3(3)      |
| C(12)-C(13)-C(14)-C(15) | -179.82(17) |
| C(13)-C(14)-C(15)-C(16) | -0.1(3)     |
| C(14)-C(15)-C(16)-C(17) | -0.2(3)     |
| C(13)-N(2)-C(17)-C(16)  | -0.1(3)     |
| C(15)-C(16)-C(17)-N(2)  | 0.3(3)      |

---

Symmetry transformations used to generate equivalent atoms:

Table S10 Atomic coordinates ( $\times 10^4$ ) and equivalent isotropic displacement parameters ( $\text{\AA}^2 \times 10^3$ )for H-4.  $U(\text{eq})$  is defined as one third of the trace of the orthogonalized  $U^{ij}$  tensor.

|        | x         | y       | z        | $U(\text{eq})$ |
|--------|-----------|---------|----------|----------------|
| S(1A)  | 5856(3)   | 3065(2) | 3128(1)  | 19(1)          |
| S(1)   | 8601(2)   | 1312(2) | 8119(1)  | 19(1)          |
| O(2A)  | 15717(7)  | 4130(4) | 5656(1)  | 17(1)          |
| O(1A)  | 6728(6)   | 224(4)  | 5487(1)  | 15(1)          |
| N(1)   | 6517(7)   | 2964(5) | 9776(1)  | 12(1)          |
| O(1)   | 8438(6)   | 4936(4) | 10479(1) | 14(1)          |
| O(2)   | -489(6)   | 1102(4) | 10663(1) | 17(1)          |
| C(11A) | 9175(9)   | 2856(6) | 4379(2)  | 12(1)          |
| N(1A)  | 8420(7)   | 1942(5) | 4781(1)  | 13(1)          |
| C(13)  | 6741(9)   | 1165(6) | 8589(2)  | 13(1)          |
| C(16A) | 7988(10)  | 4270(7) | 2804(2)  | 19(1)          |
| C(13A) | 7868(9)   | 3377(6) | 3595(2)  | 13(1)          |
| C(12A) | 7071(9)   | 2537(6) | 4021(2)  | 13(1)          |
| C(2A)  | 9878(9)   | 2127(6) | 5156(2)  | 12(1)          |
| C(3A)  | 12191(9)  | 3109(6) | 5203(2)  | 14(1)          |
| C(4A)  | 13623(9)  | 3236(6) | 5613(2)  | 13(1)          |
| C(10A) | 12579(9)  | 2283(6) | 6005(2)  | 12(1)          |
| C(5A)  | 13933(10) | 2386(6) | 6410(2)  | 15(1)          |
| C(6A)  | 12974(10) | 1490(7) | 6774(2)  | 17(1)          |
| C(14A) | 10008(10) | 4351(6) | 3496(2)  | 16(1)          |
| C(15A) | 10091(11) | 4856(7) | 3043(2)  | 22(1)          |
| C(9A)  | 10207(9)  | 1285(6) | 5970(2)  | 12(1)          |
| C(1A)  | 8743(9)   | 1130(6) | 5540(2)  | 11(1)          |
| C(8A)  | 9261(9)   | 380(6)  | 6339(2)  | 14(1)          |
| C(7A)  | 10642(10) | 485(6)  | 6735(2)  | 18(1)          |
| C(16)  | 6365(10)  | 10(7)   | 7794(2)  | 19(1)          |
| C(12)  | 7640(9)   | 2123(6) | 9018(2)  | 14(1)          |
| C(11)  | 5644(9)   | 1931(6) | 9377(2)  | 12(1)          |
| C(2)   | 5197(9)   | 2909(6) | 10155(2) | 12(1)          |
| C(1)   | 6395(9)   | 4044(6) | 10534(2) | 12(1)          |

|       |          |         |          |       |
|-------|----------|---------|----------|-------|
| C(9)  | 5105(9)  | 4067(6) | 10967(2) | 11(1) |
| C(10) | 2764(9)  | 3087(6) | 11007(2) | 12(1) |
| C(5)  | 1531(9)  | 3131(6) | 11413(2) | 16(1) |
| C(6)  | 2598(10) | 4184(7) | 11772(2) | 18(1) |
| C(14) | 4520(9)  | 146(6)  | 8490(2)  | 16(1) |
| C(15) | 4323(10) | -502(7) | 8035(2)  | 19(1) |
| C(8)  | 6181(9)  | 5112(6) | 11327(2) | 14(1) |
| C(7)  | 4927(10) | 5184(6) | 11728(2) | 19(1) |
| C(4)  | 1575(9)  | 1965(6) | 10617(2) | 12(1) |
| C(3)  | 2899(9)  | 1966(6) | 10203(2) | 13(1) |

---

Table S11 Bond lengths [ $\text{\AA}$ ] and angles [ $^\circ$ ] for H-4.

---

|               |          |
|---------------|----------|
| S(1A)-C(16A)  | 1.725(6) |
| S(1A)-C(13A)  | 1.734(5) |
| S(1)-C(16)    | 1.727(6) |
| S(1)-C(13)    | 1.733(5) |
| O(2A)-C(4A)   | 1.246(6) |
| O(1A)-C(1A)   | 1.219(6) |
| N(1)-C(2)     | 1.343(6) |
| N(1)-C(11)    | 1.452(6) |
| N(1)-H(1)     | 0.8800   |
| O(1)-C(1)     | 1.239(6) |
| O(2)-C(4)     | 1.234(6) |
| C(11A)-N(1A)  | 1.463(6) |
| C(11A)-C(12A) | 1.528(6) |
| C(11A)-H(11A) | 0.9900   |
| C(11A)-H(11B) | 0.9900   |
| N(1A)-C(2A)   | 1.343(6) |
| N(1A)-H(1A)   | 0.8800   |
| C(13)-C(14)   | 1.366(7) |
| C(13)-C(12)   | 1.500(7) |
| C(16A)-C(15A) | 1.342(8) |
| C(16A)-H(16A) | 0.9500   |
| C(13A)-C(14A) | 1.339(7) |
| C(13A)-C(12A) | 1.500(7) |
| C(12A)-H(12A) | 0.9900   |
| C(12A)-H(12B) | 0.9900   |
| C(2A)-C(3A)   | 1.375(7) |
| C(2A)-C(1A)   | 1.510(7) |
| C(3A)-C(4A)   | 1.426(7) |
| C(3A)-H(3A)   | 0.9500   |
| C(4A)-C(10A)  | 1.493(7) |
| C(10A)-C(5A)  | 1.391(7) |
| C(10A)-C(9A)  | 1.405(7) |
| C(5A)-C(6A)   | 1.391(7) |
| C(5A)-H(5A)   | 0.9500   |

|               |          |
|---------------|----------|
| C(6A)-C(7A)   | 1.390(8) |
| C(6A)-H(6A)   | 0.9500   |
| C(14A)-C(15A) | 1.423(7) |
| C(14A)-H(14A) | 0.9500   |
| C(15A)-H(15A) | 0.9500   |
| C(9A)-C(8A)   | 1.403(7) |
| C(9A)-C(1A)   | 1.482(7) |
| C(8A)-C(7A)   | 1.376(7) |
| C(8A)-H(8A)   | 0.9500   |
| C(7A)-H(7A)   | 0.9500   |
| C(16)-C(15)   | 1.346(8) |
| C(16)-H(16)   | 0.9500   |
| C(12)-C(11)   | 1.525(7) |
| C(12)-H(12C)  | 0.9900   |
| C(12)-H(12D)  | 0.9900   |
| C(11)-H(11C)  | 0.9900   |
| C(11)-H(11D)  | 0.9900   |
| C(2)-C(3)     | 1.366(7) |
| C(2)-C(1)     | 1.497(7) |
| C(1)-C(9)     | 1.474(7) |
| C(9)-C(10)    | 1.395(7) |
| C(9)-C(8)     | 1.397(7) |
| C(10)-C(5)    | 1.391(7) |
| C(10)-C(4)    | 1.513(7) |
| C(5)-C(6)     | 1.396(7) |
| C(5)-H(5)     | 0.9500   |
| C(6)-C(7)     | 1.398(8) |
| C(6)-H(6)     | 0.9500   |
| C(14)-C(15)   | 1.429(7) |
| C(14)-H(14)   | 0.9500   |
| C(15)-H(15)   | 0.9500   |
| C(8)-C(7)     | 1.386(7) |
| C(8)-H(8)     | 0.9500   |
| C(7)-H(7)     | 0.9500   |
| C(4)-C(3)     | 1.434(7) |
| C(3)-H(3)     | 0.9500   |

|                      |          |
|----------------------|----------|
| C(16A)-S(1A)-C(13A)  | 92.0(3)  |
| C(16)-S(1)-C(13)     | 92.4(3)  |
| C(2)-N(1)-C(11)      | 121.9(4) |
| C(2)-N(1)-H(1)       | 119.1    |
| C(11)-N(1)-H(1)      | 119.1    |
| N(1A)-C(11A)-C(12A)  | 110.1(4) |
| N(1A)-C(11A)-H(11A)  | 109.6    |
| C(12A)-C(11A)-H(11A) | 109.6    |
| N(1A)-C(11A)-H(11B)  | 109.6    |
| C(12A)-C(11A)-H(11B) | 109.6    |
| H(11A)-C(11A)-H(11B) | 108.2    |
| C(2A)-N(1A)-C(11A)   | 121.2(4) |
| C(2A)-N(1A)-H(1A)    | 119.4    |
| C(11A)-N(1A)-H(1A)   | 119.4    |
| C(14)-C(13)-C(12)    | 129.6(5) |
| C(14)-C(13)-S(1)     | 110.2(4) |
| C(12)-C(13)-S(1)     | 120.2(4) |
| C(15A)-C(16A)-S(1A)  | 110.8(4) |
| C(15A)-C(16A)-H(16A) | 124.6    |
| S(1A)-C(16A)-H(16A)  | 124.6    |
| C(14A)-C(13A)-C(12A) | 130.6(5) |
| C(14A)-C(13A)-S(1A)  | 110.3(4) |
| C(12A)-C(13A)-S(1A)  | 119.0(4) |
| C(13A)-C(12A)-C(11A) | 110.9(4) |
| C(13A)-C(12A)-H(12A) | 109.5    |
| C(11A)-C(12A)-H(12A) | 109.5    |
| C(13A)-C(12A)-H(12B) | 109.5    |
| C(11A)-C(12A)-H(12B) | 109.5    |
| H(12A)-C(12A)-H(12B) | 108.0    |
| N(1A)-C(2A)-C(3A)    | 125.4(4) |
| N(1A)-C(2A)-C(1A)    | 113.5(4) |
| C(3A)-C(2A)-C(1A)    | 121.1(4) |
| C(2A)-C(3A)-C(4A)    | 121.9(4) |
| C(2A)-C(3A)-H(3A)    | 119.1    |
| C(4A)-C(3A)-H(3A)    | 119.1    |



|                      |          |
|----------------------|----------|
| O(2A)-C(4A)-C(3A)    | 121.8(4) |
| O(2A)-C(4A)-C(10A)   | 119.0(4) |
| C(3A)-C(4A)-C(10A)   | 119.2(4) |
| C(5A)-C(10A)-C(9A)   | 119.2(4) |
| C(5A)-C(10A)-C(4A)   | 120.4(4) |
| C(9A)-C(10A)-C(4A)   | 120.4(4) |
| C(10A)-C(5A)-C(6A)   | 120.6(5) |
| C(10A)-C(5A)-H(5A)   | 119.7    |
| C(6A)-C(5A)-H(5A)    | 119.7    |
| C(7A)-C(6A)-C(5A)    | 119.9(5) |
| C(7A)-C(6A)-H(6A)    | 120.0    |
| C(5A)-C(6A)-H(6A)    | 120.0    |
| C(13A)-C(14A)-C(15A) | 113.7(5) |
| C(13A)-C(14A)-H(14A) | 123.1    |
| C(15A)-C(14A)-H(14A) | 123.1    |
| C(16A)-C(15A)-C(14A) | 113.1(5) |
| C(16A)-C(15A)-H(15A) | 123.5    |
| C(14A)-C(15A)-H(15A) | 123.5    |
| C(8A)-C(9A)-C(10A)   | 119.8(4) |
| C(8A)-C(9A)-C(1A)    | 119.9(4) |
| C(10A)-C(9A)-C(1A)   | 120.3(4) |
| O(1A)-C(1A)-C(9A)    | 122.7(4) |
| O(1A)-C(1A)-C(2A)    | 120.1(4) |
| C(9A)-C(1A)-C(2A)    | 117.1(4) |
| C(7A)-C(8A)-C(9A)    | 120.1(5) |
| C(7A)-C(8A)-H(8A)    | 120.0    |
| C(9A)-C(8A)-H(8A)    | 120.0    |
| C(8A)-C(7A)-C(6A)    | 120.4(5) |
| C(8A)-C(7A)-H(7A)    | 119.8    |
| C(6A)-C(7A)-H(7A)    | 119.8    |
| C(15)-C(16)-S(1)     | 111.0(4) |
| C(15)-C(16)-H(16)    | 124.5    |
| S(1)-C(16)-H(16)     | 124.5    |
| C(13)-C(12)-C(11)    | 111.8(4) |
| C(13)-C(12)-H(12C)   | 109.3    |
| C(11)-C(12)-H(12C)   | 109.3    |

|                     |          |
|---------------------|----------|
| C(13)-C(12)-H(12D)  | 109.3    |
| C(11)-C(12)-H(12D)  | 109.3    |
| H(12C)-C(12)-H(12D) | 107.9    |
| N(1)-C(11)-C(12)    | 110.2(4) |
| N(1)-C(11)-H(11C)   | 109.6    |
| C(12)-C(11)-H(11C)  | 109.6    |
| N(1)-C(11)-H(11D)   | 109.6    |
| C(12)-C(11)-H(11D)  | 109.6    |
| H(11C)-C(11)-H(11D) | 108.1    |
| N(1)-C(2)-C(3)      | 125.0(4) |
| N(1)-C(2)-C(1)      | 114.6(4) |
| C(3)-C(2)-C(1)      | 120.4(4) |
| O(1)-C(1)-C(9)      | 121.6(4) |
| O(1)-C(1)-C(2)      | 119.5(4) |
| C(9)-C(1)-C(2)      | 118.8(4) |
| C(10)-C(9)-C(8)     | 120.3(4) |
| C(10)-C(9)-C(1)     | 119.5(4) |
| C(8)-C(9)-C(1)      | 120.1(4) |
| C(5)-C(10)-C(9)     | 119.4(5) |
| C(5)-C(10)-C(4)     | 119.9(4) |
| C(9)-C(10)-C(4)     | 120.7(4) |
| C(10)-C(5)-C(6)     | 120.2(5) |
| C(10)-C(5)-H(5)     | 119.9    |
| C(6)-C(5)-H(5)      | 119.9    |
| C(5)-C(6)-C(7)      | 120.2(5) |
| C(5)-C(6)-H(6)      | 119.9    |
| C(7)-C(6)-H(6)      | 119.9    |
| C(13)-C(14)-C(15)   | 113.0(5) |
| C(13)-C(14)-H(14)   | 123.5    |
| C(15)-C(14)-H(14)   | 123.5    |
| C(16)-C(15)-C(14)   | 113.4(5) |
| C(16)-C(15)-H(15)   | 123.3    |
| C(14)-C(15)-H(15)   | 123.3    |
| C(7)-C(8)-C(9)      | 120.2(5) |
| C(7)-C(8)-H(8)      | 119.9    |
| C(9)-C(8)-H(8)      | 119.9    |

|                 |          |
|-----------------|----------|
| C(8)-C(7)-C(6)  | 119.6(5) |
| C(8)-C(7)-H(7)  | 120.2    |
| C(6)-C(7)-H(7)  | 120.2    |
| O(2)-C(4)-C(3)  | 122.5(5) |
| O(2)-C(4)-C(10) | 119.4(4) |
| C(3)-C(4)-C(10) | 118.1(4) |
| C(2)-C(3)-C(4)  | 122.4(4) |
| C(2)-C(3)-H(3)  | 118.8    |
| C(4)-C(3)-H(3)  | 118.8    |

---

Symmetry transformations used to generate equivalent atoms:

Table S12 Anisotropic displacement parameters ( $\text{\AA}^2 \times 10^3$ ) for H-4. The anisotropic displacement factor exponent takes the form:  $-2\pi^2 [ h^2 a^{*2} U^{11} + \dots + 2 h k a^* b^* U^{12} ]$

|        | U <sup>11</sup> | U <sup>22</sup> | U <sup>33</sup> | U <sup>23</sup> | U <sup>13</sup> | U <sup>12</sup> |
|--------|-----------------|-----------------|-----------------|-----------------|-----------------|-----------------|
| S(1A)  | 16(1)           | 20(1)           | 21(1)           | 2(1)            | -5(1)           | 1(1)            |
| S(1)   | 14(1)           | 22(1)           | 21(1)           | -3(1)           | 5(1)            | 0(1)            |
| O(2A)  | 13(2)           | 12(2)           | 25(2)           | 2(1)            | 0(1)            | -4(1)           |
| O(1A)  | 10(2)           | 14(2)           | 21(2)           | 1(1)            | 2(1)            | -1(1)           |
| N(1)   | 7(2)            | 11(2)           | 17(2)           | -1(2)           | 1(2)            | -2(2)           |
| O(1)   | 8(2)            | 14(2)           | 21(2)           | 1(1)            | 3(1)            | 0(1)            |
| O(2)   | 9(2)            | 14(2)           | 27(2)           | 0(1)            | 2(1)            | -2(1)           |
| C(11A) | 8(2)            | 12(2)           | 15(2)           | 2(2)            | 1(2)            | 2(2)            |
| N(1A)  | 7(2)            | 12(2)           | 17(2)           | 1(2)            | 1(2)            | -2(2)           |
| C(13)  | 12(2)           | 13(2)           | 15(2)           | 2(2)            | 2(2)            | 6(2)            |
| C(16A) | 22(3)           | 19(3)           | 16(2)           | 5(2)            | -2(2)           | 3(2)            |
| C(13A) | 11(2)           | 12(2)           | 19(2)           | -4(2)           | -3(2)           | 6(2)            |
| C(12A) | 7(2)            | 11(2)           | 21(3)           | 1(2)            | 1(2)            | 0(2)            |
| C(2A)  | 13(2)           | 10(2)           | 13(2)           | 2(2)            | 2(2)            | 4(2)            |
| C(3A)  | 15(2)           | 10(2)           | 15(2)           | 1(2)            | 1(2)            | 1(2)            |
| C(4A)  | 9(2)            | 7(2)            | 21(3)           | -1(2)           | 4(2)            | 1(2)            |
| C(10A) | 13(2)           | 5(2)            | 18(2)           | -2(2)           | 2(2)            | 1(2)            |
| C(5A)  | 14(2)           | 13(2)           | 18(2)           | 0(2)            | 0(2)            | 3(2)            |
| C(6A)  | 20(3)           | 20(3)           | 13(2)           | 1(2)            | -2(2)           | 7(2)            |
| C(14A) | 13(2)           | 15(2)           | 21(3)           | 2(2)            | 1(2)            | 2(2)            |
| C(15A) | 24(3)           | 22(3)           | 22(3)           | 4(2)            | 5(2)            | 4(2)            |
| C(9A)  | 12(2)           | 8(2)            | 16(2)           | 0(2)            | 3(2)            | 3(2)            |
| C(1A)  | 8(2)            | 7(2)            | 19(2)           | -1(2)           | 3(2)            | 2(2)            |
| C(8A)  | 6(2)            | 12(2)           | 23(3)           | 0(2)            | 1(2)            | 1(2)            |
| C(7A)  | 21(3)           | 15(2)           | 20(3)           | 4(2)            | 7(2)            | 6(2)            |
| C(16)  | 17(3)           | 23(3)           | 19(3)           | -6(2)           | -2(2)           | 7(2)            |
| C(12)  | 12(2)           | 10(2)           | 18(2)           | -2(2)           | 0(2)            | 1(2)            |
| C(11)  | 12(2)           | 8(2)            | 16(2)           | 0(2)            | -1(2)           | 1(2)            |
| C(2)   | 17(2)           | 8(2)            | 12(2)           | 0(2)            | -1(2)           | 6(2)            |
| C(1)   | 13(2)           | 6(2)            | 16(2)           | 1(2)            | 0(2)            | 2(2)            |
| C(9)   | 14(2)           | 6(2)            | 14(2)           | 4(2)            | 0(2)            | 4(2)            |

|       |       |       |       |       |       |      |
|-------|-------|-------|-------|-------|-------|------|
| C(10) | 14(2) | 7(2)  | 17(2) | 3(2)  | -1(2) | 1(2) |
| C(5)  | 12(2) | 13(2) | 23(3) | 3(2)  | 2(2)  | 0(2) |
| C(6)  | 20(3) | 20(3) | 15(2) | 2(2)  | 4(2)  | 7(2) |
| C(14) | 12(2) | 17(2) | 21(3) | 0(2)  | 4(2)  | 4(2) |
| C(15) | 14(3) | 22(3) | 21(3) | -4(2) | -4(2) | 1(2) |
| C(8)  | 12(2) | 9(2)  | 22(3) | 5(2)  | 0(2)  | 5(2) |
| C(7)  | 25(3) | 15(2) | 18(3) | 0(2)  | -3(2) | 9(2) |
| C(4)  | 10(2) | 5(2)  | 19(2) | 4(2)  | -1(2) | 1(2) |
| C(3)  | 13(2) | 10(2) | 15(2) | -1(2) | -1(2) | 2(2) |

---

Table S13 Torsion angles [°] for H-4.

---

|                             |           |
|-----------------------------|-----------|
| C(12A)-C(11A)-N(1A)-C(2A)   | -174.7(4) |
| C(16)-S(1)-C(13)-C(14)      | 0.3(4)    |
| C(16)-S(1)-C(13)-C(12)      | -178.3(4) |
| C(13A)-S(1A)-C(16A)-C(15A)  | 0.2(4)    |
| C(16A)-S(1A)-C(13A)-C(14A)  | 0.2(4)    |
| C(16A)-S(1A)-C(13A)-C(12A)  | -178.0(4) |
| C(14A)-C(13A)-C(12A)-C(11A) | -2.3(7)   |
| S(1A)-C(13A)-C(12A)-C(11A)  | 175.6(3)  |
| N(1A)-C(11A)-C(12A)-C(13A)  | -176.4(4) |
| C(11A)-N(1A)-C(2A)-C(3A)    | -2.2(7)   |
| C(11A)-N(1A)-C(2A)-C(1A)    | 177.9(4)  |
| N(1A)-C(2A)-C(3A)-C(4A)     | -179.9(4) |
| C(1A)-C(2A)-C(3A)-C(4A)     | 0.0(7)    |
| C(2A)-C(3A)-C(4A)-O(2A)     | -179.8(5) |
| C(2A)-C(3A)-C(4A)-C(10A)    | -0.4(7)   |
| O(2A)-C(4A)-C(10A)-C(5A)    | -0.4(7)   |
| C(3A)-C(4A)-C(10A)-C(5A)    | -179.9(4) |
| O(2A)-C(4A)-C(10A)-C(9A)    | 179.0(4)  |
| C(3A)-C(4A)-C(10A)-C(9A)    | -0.4(7)   |
| C(9A)-C(10A)-C(5A)-C(6A)    | 1.1(7)    |
| C(4A)-C(10A)-C(5A)-C(6A)    | -179.5(4) |
| C(10A)-C(5A)-C(6A)-C(7A)    | -0.1(7)   |
| C(12A)-C(13A)-C(14A)-C(15A) | 177.4(5)  |
| S(1A)-C(13A)-C(14A)-C(15A)  | -0.6(6)   |
| S(1A)-C(16A)-C(15A)-C(14A)  | -0.5(6)   |
| C(13A)-C(14A)-C(15A)-C(16A) | 0.7(7)    |
| C(5A)-C(10A)-C(9A)-C(8A)    | -1.3(7)   |
| C(4A)-C(10A)-C(9A)-C(8A)    | 179.2(4)  |
| C(5A)-C(10A)-C(9A)-C(1A)    | -179.0(4) |
| C(4A)-C(10A)-C(9A)-C(1A)    | 1.6(7)    |
| C(8A)-C(9A)-C(1A)-O(1A)     | -0.9(7)   |
| C(10A)-C(9A)-C(1A)-O(1A)    | 176.7(4)  |
| C(8A)-C(9A)-C(1A)-C(2A)     | -179.6(4) |
| C(10A)-C(9A)-C(1A)-C(2A)    | -2.0(6)   |

|                          |           |
|--------------------------|-----------|
| N(1A)-C(2A)-C(1A)-O(1A)  | 2.3(6)    |
| C(3A)-C(2A)-C(1A)-O(1A)  | -177.6(4) |
| N(1A)-C(2A)-C(1A)-C(9A)  | -178.9(4) |
| C(3A)-C(2A)-C(1A)-C(9A)  | 1.2(6)    |
| C(10A)-C(9A)-C(8A)-C(7A) | 0.6(7)    |
| C(1A)-C(9A)-C(8A)-C(7A)  | 178.3(4)  |
| C(9A)-C(8A)-C(7A)-C(6A)  | 0.3(7)    |
| C(5A)-C(6A)-C(7A)-C(8A)  | -0.6(8)   |
| C(13)-S(1)-C(16)-C(15)   | -0.1(4)   |
| C(14)-C(13)-C(12)-C(11)  | -2.8(7)   |
| S(1)-C(13)-C(12)-C(11)   | 175.4(3)  |
| C(2)-N(1)-C(11)-C(12)    | -174.1(4) |
| C(13)-C(12)-C(11)-N(1)   | -176.2(4) |
| C(11)-N(1)-C(2)-C(3)     | -3.0(7)   |
| C(11)-N(1)-C(2)-C(1)     | 179.3(4)  |
| N(1)-C(2)-C(1)-O(1)      | 0.4(6)    |
| C(3)-C(2)-C(1)-O(1)      | -177.3(4) |
| N(1)-C(2)-C(1)-C(9)      | -179.5(4) |
| C(3)-C(2)-C(1)-C(9)      | 2.7(6)    |
| O(1)-C(1)-C(9)-C(10)     | 177.6(4)  |
| C(2)-C(1)-C(9)-C(10)     | -2.5(6)   |
| O(1)-C(1)-C(9)-C(8)      | -0.1(7)   |
| C(2)-C(1)-C(9)-C(8)      | 179.9(4)  |
| C(8)-C(9)-C(10)-C(5)     | -1.4(7)   |
| C(1)-C(9)-C(10)-C(5)     | -179.0(4) |
| C(8)-C(9)-C(10)-C(4)     | 179.4(4)  |
| C(1)-C(9)-C(10)-C(4)     | 1.8(6)    |
| C(9)-C(10)-C(5)-C(6)     | 1.8(7)    |
| C(4)-C(10)-C(5)-C(6)     | -179.0(4) |
| C(10)-C(5)-C(6)-C(7)     | -0.9(7)   |
| C(12)-C(13)-C(14)-C(15)  | 177.9(5)  |
| S(1)-C(13)-C(14)-C(15)   | -0.4(6)   |
| S(1)-C(16)-C(15)-C(14)   | -0.2(6)   |
| C(13)-C(14)-C(15)-C(16)  | 0.4(7)    |
| C(10)-C(9)-C(8)-C(7)     | 0.0(7)    |
| C(1)-C(9)-C(8)-C(7)      | 177.5(4)  |

|                      |           |
|----------------------|-----------|
| C(9)-C(8)-C(7)-C(6)  | 1.0(7)    |
| C(5)-C(6)-C(7)-C(8)  | -0.6(7)   |
| C(5)-C(10)-C(4)-O(2) | 0.3(7)    |
| C(9)-C(10)-C(4)-O(2) | 179.5(4)  |
| C(5)-C(10)-C(4)-C(3) | 179.6(4)  |
| C(9)-C(10)-C(4)-C(3) | -1.2(6)   |
| N(1)-C(2)-C(3)-C(4)  | -179.7(4) |
| C(1)-C(2)-C(3)-C(4)  | -2.2(7)   |
| O(2)-C(4)-C(3)-C(2)  | -179.3(4) |
| C(10)-C(4)-C(3)-C(2) | 1.5(7)    |

---

Symmetry transformations used to generate equivalent atoms:



Table S14 Hydrogen bonds for H-4 [ $\text{\AA}$  and  $^\circ$ ].

| D-H...A                 | d(D-H) | d(H...A) | d(D...A) | <(DHA) |
|-------------------------|--------|----------|----------|--------|
| C(3)-H(3)...O(2)#1      | 0.95   | 2.65     | 3.584(6) | 168.1  |
| C(14)-H(14)...O(2)#1    | 0.95   | 2.50     | 3.440(6) | 168.1  |
| C(12)-H(12D)...O(2)#2   | 0.99   | 2.59     | 3.392(6) | 138.0  |
| C(16)-H(16)...S(1A)#3   | 0.95   | 2.95     | 3.681(5) | 134.7  |
| C(14A)-H(14A)...O(2A)#4 | 0.95   | 2.51     | 3.445(6) | 168.5  |
| C(3A)-H(3A)...O(2A)#4   | 0.95   | 2.61     | 3.545(6) | 168.9  |
| C(12A)-H(12B)...O(2A)#5 | 0.99   | 2.61     | 3.405(6) | 137.5  |
| N(1A)-H(1A)...O(1A)#3   | 0.88   | 2.28     | 3.120(5) | 159.8  |
| N(1)-H(1)...O(1)#6      | 0.88   | 2.26     | 3.105(5) | 161.4  |
| C(3)-H(3)...O(2)#1      | 0.95   | 2.65     | 3.584(6) | 168.1  |
| C(14)-H(14)...O(2)#1    | 0.95   | 2.50     | 3.440(6) | 168.1  |
| C(12)-H(12D)...O(2)#2   | 0.99   | 2.59     | 3.392(6) | 138.0  |
| N(1)-H(1)...O(1)#6      | 0.88   | 2.26     | 3.105(5) | 161.4  |
| C(3)-H(3)...O(2)#1      | 0.95   | 2.65     | 3.584(6) | 168.1  |
| C(14)-H(14)...O(2)#1    | 0.95   | 2.50     | 3.440(6) | 168.1  |
| C(12)-H(12D)...O(2)#2   | 0.99   | 2.59     | 3.392(6) | 138.0  |
| C(16)-H(16)...S(1A)#3   | 0.95   | 2.95     | 3.681(5) | 134.7  |
| C(14A)-H(14A)...O(2A)#4 | 0.95   | 2.51     | 3.445(6) | 168.5  |
| C(3A)-H(3A)...O(2A)#4   | 0.95   | 2.61     | 3.545(6) | 168.9  |
| C(12A)-H(12B)...O(2A)#5 | 0.99   | 2.61     | 3.405(6) | 137.5  |
| N(1A)-H(1A)...O(1A)#3   | 0.88   | 2.28     | 3.120(5) | 159.8  |
| N(1)-H(1)...O(1)#6      | 0.88   | 2.26     | 3.105(5) | 161.4  |
| C(3)-H(3)...O(2)#1      | 0.95   | 2.65     | 3.584(6) | 168.1  |
| C(14)-H(14)...O(2)#1    | 0.95   | 2.50     | 3.440(6) | 168.1  |
| C(12)-H(12D)...O(2)#2   | 0.99   | 2.59     | 3.392(6) | 138.0  |
| N(1)-H(1)...O(1)#6      | 0.88   | 2.26     | 3.105(5) | 161.4  |
| N(1)-H(1)...O(1)#6      | 0.88   | 2.26     | 3.105(5) | 161.4  |
| N(1A)-H(1A)...O(1A)#3   | 0.88   | 2.28     | 3.120(5) | 159.8  |
| C(12A)-H(12B)...O(2A)#5 | 0.99   | 2.61     | 3.405(6) | 137.5  |
| C(3A)-H(3A)...O(2A)#4   | 0.95   | 2.61     | 3.545(6) | 168.9  |
| C(14A)-H(14A)...O(2A)#4 | 0.95   | 2.51     | 3.445(6) | 168.5  |
| C(16)-H(16)...S(1A)#3   | 0.95   | 2.95     | 3.681(5) | 134.7  |

|                         |      |      |          |       |
|-------------------------|------|------|----------|-------|
| C(12)-H(12D)...O(2)#2   | 0.99 | 2.59 | 3.392(6) | 138.0 |
| C(14)-H(14)...O(2)#1    | 0.95 | 2.50 | 3.440(6) | 168.1 |
| C(3)-H(3)...O(2)#1      | 0.95 | 2.65 | 3.584(6) | 168.1 |
| N(1)-H(1)...O(1)#6      | 0.88 | 2.26 | 3.105(5) | 161.4 |
| N(1A)-H(1A)...O(1A)#3   | 0.88 | 2.28 | 3.120(5) | 159.8 |
| C(12A)-H(12B)...O(2A)#5 | 0.99 | 2.61 | 3.405(6) | 137.5 |
| C(3A)-H(3A)...O(2A)#4   | 0.95 | 2.61 | 3.545(6) | 168.9 |
| C(14A)-H(14A)...O(2A)#4 | 0.95 | 2.51 | 3.445(6) | 168.5 |
| C(16)-H(16)...S(1A)#3   | 0.95 | 2.95 | 3.681(5) | 134.7 |
| C(12)-H(12D)...O(2)#2   | 0.99 | 2.59 | 3.392(6) | 138.0 |
| C(14)-H(14)...O(2)#1    | 0.95 | 2.50 | 3.440(6) | 168.1 |
| C(3)-H(3)...O(2)#1      | 0.95 | 2.65 | 3.584(6) | 168.1 |
| N(1)-H(1)...O(1)#6      | 0.88 | 2.26 | 3.105(5) | 161.4 |
| N(1A)-H(1A)...O(1A)#3   | 0.88 | 2.28 | 3.120(5) | 159.8 |
| C(12A)-H(12B)...O(2A)#5 | 0.99 | 2.61 | 3.405(6) | 137.5 |
| C(3A)-H(3A)...O(2A)#4   | 0.95 | 2.61 | 3.545(6) | 168.9 |
| C(14A)-H(14A)...O(2A)#4 | 0.95 | 2.51 | 3.445(6) | 168.5 |
| C(16)-H(16)...S(1A)#3   | 0.95 | 2.95 | 3.681(5) | 134.7 |
| C(12)-H(12D)...O(2)#2   | 0.99 | 2.59 | 3.392(6) | 138.0 |
| C(14)-H(14)...O(2)#1    | 0.95 | 2.50 | 3.440(6) | 168.1 |
| C(3)-H(3)...O(2)#1      | 0.95 | 2.65 | 3.584(6) | 168.1 |

---

Symmetry transformations used to generate equivalent atoms:

#1 -x,-y,-z+2 #2 -x+1,-y,-z+2 #3 -x+1,-y,-z+1

#4 -x+3,-y+1,-z+1 #5 -x+2,-y+1,-z+1 #6 -x+2,-y+1,-z+2
